# Supplementary material for: Origins of the central Macaronesian psyllid lineages (Hemiptera; Psylloidea) with characterization of a new island radiation on endemic Convolvulus floridus (Convolvulaceae) in the Canary Islands
Source: PubMed Central journal article supplement (PMC10817144; doi:10.1371/journal.pone.0297062), 2024-01-26

# PLOS ONE

## Origins of the central Macaronesian psyllid lineages (Hemiptera; Psylloidea) with characterization of a new island radiation on endemic *Convolvulus floridus* (Convolvulaceae) in the Canary Islands

--Manuscript Draft--

|                                                                                                                                                                                                                                                                                          |                                                                                                                                                                                                                                                                                                                                                                                                                                                                                                                                                                                                                                                                                                                                                                                                                                                                                                                                                                                                                                                                                                                                                                                                                                                                                                                                                                                                                                                                                                                                                                                                                                                                                                                                                                 |
|------------------------------------------------------------------------------------------------------------------------------------------------------------------------------------------------------------------------------------------------------------------------------------------|-----------------------------------------------------------------------------------------------------------------------------------------------------------------------------------------------------------------------------------------------------------------------------------------------------------------------------------------------------------------------------------------------------------------------------------------------------------------------------------------------------------------------------------------------------------------------------------------------------------------------------------------------------------------------------------------------------------------------------------------------------------------------------------------------------------------------------------------------------------------------------------------------------------------------------------------------------------------------------------------------------------------------------------------------------------------------------------------------------------------------------------------------------------------------------------------------------------------------------------------------------------------------------------------------------------------------------------------------------------------------------------------------------------------------------------------------------------------------------------------------------------------------------------------------------------------------------------------------------------------------------------------------------------------------------------------------------------------------------------------------------------------|
| <b>Manuscript Number:</b>                                                                                                                                                                                                                                                                | PONE-D-23-30814                                                                                                                                                                                                                                                                                                                                                                                                                                                                                                                                                                                                                                                                                                                                                                                                                                                                                                                                                                                                                                                                                                                                                                                                                                                                                                                                                                                                                                                                                                                                                                                                                                                                                                                                                 |
| <b>Article Type:</b>                                                                                                                                                                                                                                                                     | Research Article                                                                                                                                                                                                                                                                                                                                                                                                                                                                                                                                                                                                                                                                                                                                                                                                                                                                                                                                                                                                                                                                                                                                                                                                                                                                                                                                                                                                                                                                                                                                                                                                                                                                                                                                                |
| <b>Full Title:</b>                                                                                                                                                                                                                                                                       | Origins of the central Macaronesian psyllid lineages (Hemiptera; Psylloidea) with characterization of a new island radiation on endemic <i>Convolvulus floridus</i> (Convolvulaceae) in the Canary Islands                                                                                                                                                                                                                                                                                                                                                                                                                                                                                                                                                                                                                                                                                                                                                                                                                                                                                                                                                                                                                                                                                                                                                                                                                                                                                                                                                                                                                                                                                                                                                      |
| <b>Short Title:</b>                                                                                                                                                                                                                                                                      | Phylogenetic origins of central Macaronesian psyllids                                                                                                                                                                                                                                                                                                                                                                                                                                                                                                                                                                                                                                                                                                                                                                                                                                                                                                                                                                                                                                                                                                                                                                                                                                                                                                                                                                                                                                                                                                                                                                                                                                                                                                           |
| <b>Corresponding Author:</b>                                                                                                                                                                                                                                                             | Diana M. Percy<br>The University of British Columbia<br>Vancouver, British Columbia CANADA                                                                                                                                                                                                                                                                                                                                                                                                                                                                                                                                                                                                                                                                                                                                                                                                                                                                                                                                                                                                                                                                                                                                                                                                                                                                                                                                                                                                                                                                                                                                                                                                                                                                      |
| <b>Keywords:</b>                                                                                                                                                                                                                                                                         | cladogenesis, host plant association, host specificity, island colonization, <i>Percyella</i> radiation, phylogeny, speciation                                                                                                                                                                                                                                                                                                                                                                                                                                                                                                                                                                                                                                                                                                                                                                                                                                                                                                                                                                                                                                                                                                                                                                                                                                                                                                                                                                                                                                                                                                                                                                                                                                  |
| <b>Abstract:</b>                                                                                                                                                                                                                                                                         | A molecular survey of native and introduced psyllids in the central Macaronesian islands provides the first comprehensive phylogenetic assessment of the origins of the psyllid fauna of the Canary and Madeira archipelagos. We employ a maximum likelihood backbone constraint analysis to place the central Macaronesian taxa within the Psylloidea mitogenome phylogeny. The native psyllid fauna in these central Macaronesian islands results from an estimated 26 independent colonization events. Island host plants are predicted by host plants of continental relatives in nearly all cases and six plant genera have been colonized multiple times ( <i>Chamaecytisus</i> , <i>Convolvulus</i> , <i>Rhamnus</i> , <i>Pistacia</i> , <i>Olea</i> and <i>Spartocytisus</i> ) from the continent. Post-colonization diversification varies from no further cladogenesis (18 events, represented by a single native taxon) to modest in situ diversification resulting in two to four native taxa and, surprisingly, given the diverse range of islands and habitats, only one substantial species radiation with more than four native species. Specificity to ancestral host plant genera or family is typically maintained during in situ diversification both within and among islands. Characterization of a recently discovered island radiation consisting of four species on <i>Convolvulus floridus</i> in the Canary Islands shows patterns and rates of diversification that reflect island topographic complexity and geological dynamism. Although modest in species diversity, this radiation is atypical in diversification on a single host plant species, but typical in the primary role of allopatry in the diversification process. |
| <b>Order of Authors:</b>                                                                                                                                                                                                                                                                 | Saskia Bastín<br>J. Alfredo Reyes-Betancort<br>Felipe Siverio de la Rosa<br>Diana M. Percy                                                                                                                                                                                                                                                                                                                                                                                                                                                                                                                                                                                                                                                                                                                                                                                                                                                                                                                                                                                                                                                                                                                                                                                                                                                                                                                                                                                                                                                                                                                                                                                                                                                                      |
| <b>Additional Information:</b>                                                                                                                                                                                                                                                           |                                                                                                                                                                                                                                                                                                                                                                                                                                                                                                                                                                                                                                                                                                                                                                                                                                                                                                                                                                                                                                                                                                                                                                                                                                                                                                                                                                                                                                                                                                                                                                                                                                                                                                                                                                 |
| <b>Question</b>                                                                                                                                                                                                                                                                          | <b>Response</b>                                                                                                                                                                                                                                                                                                                                                                                                                                                                                                                                                                                                                                                                                                                                                                                                                                                                                                                                                                                                                                                                                                                                                                                                                                                                                                                                                                                                                                                                                                                                                                                                                                                                                                                                                 |
| <b>Financial Disclosure</b>                                                                                                                                                                                                                                                              | Yes                                                                                                                                                                                                                                                                                                                                                                                                                                                                                                                                                                                                                                                                                                                                                                                                                                                                                                                                                                                                                                                                                                                                                                                                                                                                                                                                                                                                                                                                                                                                                                                                                                                                                                                                                             |
| Enter a financial disclosure statement that describes the sources of funding for the work included in this submission. Review the <a href="#">submission guidelines</a> for detailed requirements. View published research articles from <a href="#">PLOS ONE</a> for specific examples. |                                                                                                                                                                                                                                                                                                                                                                                                                                                                                                                                                                                                                                                                                                                                                                                                                                                                                                                                                                                                                                                                                                                                                                                                                                                                                                                                                                                                                                                                                                                                                                                                                                                                                                                                                                 |

This statement is required for submission and **will appear in the published article** if the submission is accepted. Please make sure it is accurate.

**Funded studies**

Enter a statement with the following details:

- Initials of the authors who received each award
- Grant numbers awarded to each author
- The full name of each funder
- URL of each funder website
- Did the sponsors or funders play any role in the study design, data collection and analysis, decision to publish, or preparation of the manuscript?

Did you receive funding for this work?

Please add funding details.  
as follow-up to "**Financial Disclosure**

Enter a financial disclosure statement that describes the sources of funding for the work included in this submission. Review the [submission guidelines](#) for detailed requirements. View published research articles from [PLOS ONE](#) for specific examples.

This statement is required for submission and **will appear in the published article** if the submission is accepted. Please make sure it is accurate.

**Funded studies**

Enter a statement with the following details:

- Initials of the authors who received each award
- Grant numbers awarded to each author
- The full name of each funder
- URL of each funder website
- Did the sponsors or funders play any role in the study design, data collection and analysis, decision to publish, or preparation of the manuscript?

Funding statement: This research was carried out with financial support from the research project CUARENTAGRI (MAC2/1.1a/231).

|                                                                                                                                                                                                                                                                                                                                                                                                                                                                                                                                                                                                                                                                                                                                                                                                                                                                                                                                                                                                                                                                                                                                                 |                                                                     |
|-------------------------------------------------------------------------------------------------------------------------------------------------------------------------------------------------------------------------------------------------------------------------------------------------------------------------------------------------------------------------------------------------------------------------------------------------------------------------------------------------------------------------------------------------------------------------------------------------------------------------------------------------------------------------------------------------------------------------------------------------------------------------------------------------------------------------------------------------------------------------------------------------------------------------------------------------------------------------------------------------------------------------------------------------------------------------------------------------------------------------------------------------|---------------------------------------------------------------------|
| <p>Did you receive funding for this work?"</p>                                                                                                                                                                                                                                                                                                                                                                                                                                                                                                                                                                                                                                                                                                                                                                                                                                                                                                                                                                                                                                                                                                  |                                                                     |
| <p>Please select the country of your main research funder (please select carefully as in some cases this is used in fee calculation).</p> <p>as follow-up to "<b>Financial Disclosure</b></p> <p>Enter a financial disclosure statement that describes the sources of funding for the work included in this submission. Review the <a href="#">submission guidelines</a> for detailed requirements. View published research articles from <a href="#">PLOS ONE</a> for specific examples.</p> <p>This statement is required for submission and <b>will appear in the published article</b> if the submission is accepted. Please make sure it is accurate.</p> <p><b>Funded studies</b><br/> Enter a statement with the following details:</p> <ul style="list-style-type: none"> <li>• Initials of the authors who received each award</li> <li>• Grant numbers awarded to each author</li> <li>• The full name of each funder</li> <li>• URL of each funder website</li> <li>• Did the sponsors or funders play any role in the study design, data collection and analysis, decision to publish, or preparation of the manuscript?</li> </ul> | <p>SPAIN - ES</p>                                                   |
| <p>Did you receive funding for this work?"</p> <p><b>Competing Interests</b></p> <p>Use the instructions below to enter a competing interest statement for this submission. On behalf of all authors, disclose any <a href="#">competing interests</a> that could be perceived to bias this work—acknowledging all financial support and any other relevant financial or non-financial competing interests.</p> <p>This statement is <b>required</b> for submission</p>                                                                                                                                                                                                                                                                                                                                                                                                                                                                                                                                                                                                                                                                         | <p>The authors have declared that no competing interests exist.</p> |

and **will appear in the published article** if the submission is accepted. Please make sure it is accurate and that any funding sources listed in your Funding Information later in the submission form are also declared in your Financial Disclosure statement.

View published research articles from [PLOS ONE](#) for specific examples.

**NO authors have competing interests**

Enter: *The authors have declared that no competing interests exist.*

**Authors with competing interests**

Enter competing interest details beginning with this statement:

*I have read the journal's policy and the authors of this manuscript have the following competing interests: [insert competing interests here]*

\* typeset

**Ethics Statement**

Enter an ethics statement for this submission. This statement is required if the study involved:

- Human participants
- Human specimens or tissue
- Vertebrate animals or cephalopods
- Vertebrate embryos or tissues
- Field research

Write "N/A" if the submission does not require an ethics statement.

General guidance is provided below. Consult the [submission guidelines](#) for detailed instructions. **Make sure that all information entered here is included in the Methods section of the manuscript.**

N/A

**Format for specific study types**

**Human Subject Research (involving human participants and/or tissue)**

- Give the name of the institutional review board or ethics committee that approved the study
- Include the approval number and/or a statement indicating approval of this research
- Indicate the form of consent obtained (written/oral) or the reason that consent was not obtained (e.g. the data were analyzed anonymously)

**Animal Research (involving vertebrate animals, embryos or tissues)**

- Provide the name of the Institutional Animal Care and Use Committee (IACUC) or other relevant ethics board that reviewed the study protocol, and indicate whether they approved this research or granted a formal waiver of ethical approval
- Include an approval number if one was obtained
- If the study involved *non-human primates*, add *additional details* about animal welfare and steps taken to ameliorate suffering
- If anesthesia, euthanasia, or any kind of animal sacrifice is part of the study, include briefly which substances and/or methods were applied

**Field Research**

Include the following details if this study involves the collection of plant, animal, or other materials from a natural setting:

- Field permit number
- Name of the institution or relevant body that granted permission

**Data Availability**

Authors are required to make all data underlying the findings described fully available, without restriction, and from the time of publication. PLOS allows rare exceptions to address legal and ethical concerns. See the [PLOS Data Policy](#) and [FAQ](#) for detailed information.

Yes - all data are fully available without restriction

A Data Availability Statement describing where the data can be found is required at submission. Your answers to this question constitute the Data Availability Statement and **will be published in the article**, if accepted.

**Important:** Stating 'data available on request from the author' is not sufficient. If your data are only available upon request, select 'No' for the first question and explain your exceptional situation in the text box.

Do the authors confirm that all data underlying the findings described in their manuscript are fully available without restriction?

**Describe where the data may be found in full sentences. If you are copying our sample text, replace any instances of XXX with the appropriate details.**

- If the data are **held or will be held in a public repository**, include URLs, accession numbers or DOIs. If this information will only be available after acceptance, indicate this by ticking the box below. For example: *All XXX files are available from the XXX database (accession number(s) XXX, XXX).*
- If the data are all contained **within the manuscript and/or Supporting Information files**, enter the following: *All relevant data are within the manuscript and its Supporting Information files.*
- If neither of these applies but you are able to provide **details of access elsewhere**, with or without limitations, please do so. For example:

*Data cannot be shared publicly because of [XXX]. Data are available from the XXX Institutional Data Access / Ethics Committee (contact via XXX) for researchers who meet the criteria for access to confidential data.*

*The data underlying the results presented in the study are available from (include the name of the third party*

Data availability statement: All sequences generated for this study are deposited in Genbank (Accessions: XXXXXXXX-XXXXXXX, XXXXXXXX-XXXXXXX). Sequence alignment files are available from the corresponding author on request and are openly available from "figshare" at <http://doi.org/XXXXXX>. All other data is contained in this article.

|                                                                                                                                                                                                                                         |                                                                                                                                                                                  |
|-----------------------------------------------------------------------------------------------------------------------------------------------------------------------------------------------------------------------------------------|----------------------------------------------------------------------------------------------------------------------------------------------------------------------------------|
| <p><i>and contact information or URL).</i></p> <ul style="list-style-type: none"><li>• This text is appropriate if the data are owned by a third party and authors do not have permission to share the data.</li></ul> <p>* typeset</p> |                                                                                                                                                                                  |
| Additional data availability information:                                                                                                                                                                                               | Tick here if the URLs/accession numbers/DOIs will be available only after acceptance of the manuscript for publication so that we can ensure their inclusion before publication. |

1 Running title: Phylogenetic origins of central Macaronesian psyllids

2

3 **Origins of the central Macaronesian psyllid lineages (Hemiptera; Psylloidea) with**  
4 **characterization of a new island radiation on endemic *Convolvulus floridus* (Convolvulaceae)**  
5 **in the Canary Islands**

6 Saskia Bastín<sup>1</sup>, J. Alfredo Reyes-Betancort<sup>2</sup>, Felipe Siverio de la Rosa<sup>1</sup> and Diana M. Percy<sup>3\*</sup>

7

8 <sup>1</sup>Instituto Canario de Investigaciones Agrarias, Unidad de Protección Vegetal, C/ El Boquerón  
9 s/n, 38200, La Laguna, Tenerife, Spain.

10 E-mail: bastin.saskia@hotmail.be; <https://orcid.org/0000-0001-9307-7223>

11 E-mail: fsiverio@icia.es; <https://orcid.org/0000-0002-8886-414X>

12 <sup>2</sup>Instituto Canario de Investigaciones Agrarias, Jardín de Aclimatación de La Oratava, C/ Retama  
13 2, 38400 Puerto de la Cruz, Tenerife, Spain.

14 E-mail: areyes@icia.es; <https://orcid.org/0000-0003-0732-3219>

15 <sup>3</sup>Botany Department and Biodiversity Research Centre, University of British Columbia,  
16 Vancouver, British Columbia, Canada.

17 E-mail: diana.percy@ubc.ca; <https://orcid.org/0000-0002-0468-2892>

18

19 \*Corresponding author E-mail: diana.percy@ubc.ca

20

21 **Data availability statement:** All sequences generated for this study are deposited in Genbank  
22 (Accessions: XXXXXXXX-XXXXXXX, XXXXXXXX-XXXXXXX). Sequence alignment files are available  
23 from the corresponding author on request and are openly available from “figshare” at  
24 <http://doi.org/XXXXXX>. All other data is contained in this article.

25 **Funding statement:** This research was carried out with financial support from the research  
26 project CUARENTAGRI (MAC2/1.1a/231).

27 **Conflict of interest disclosure:** The authors declare they do not have any conflicts of interest.

28 **Ethics approval statement:** N/A

29 **Permission to reproduce material from other sources:** N/A



30 **Author contributions**

31 SB, FSR and DMP conceived of the study; SB, ARB, and DMP conducted the fieldwork; SB and  
32 DMP conducted the lab work and analyses; all authors contributed to the writing of the  
33 manuscript.

34

35 **Abstract**

36 A molecular survey of native and introduced psyllids in the central Macaronesian islands  
37 provides the first comprehensive phylogenetic assessment of the origins of the psyllid fauna of  
38 the Canary and Madeira archipelagos. We employ a maximum likelihood backbone constraint  
39 analysis to place the central Macaronesian taxa within the Psylloidea mitogenome phylogeny.  
40 The native psyllid fauna in these central Macaronesian islands results from an estimated 26  
41 independent colonization events. Island host plants are predicted by host plants of continental  
42 relatives in nearly all cases and six plant genera have been colonized multiple times  
43 (*Chamaecytisus*, *Convolvulus*, *Rhamnus*, *Pistacia*, *Olea* and *Spartocytisus*) from the continent.  
44 Post-colonization diversification varies from no further cladogenesis (18 events, represented by  
45 a single native taxon) to modest in situ diversification resulting in two to four native taxa and,  
46 surprisingly, given the diverse range of islands and habitats, only one substantial species  
47 radiation with more than four native species. Specificity to ancestral host plant genera or family  
48 is typically maintained during in situ diversification both within and among islands.  
49 Characterization of a recently discovered island radiation consisting of four species on  
50 *Convolvulus floridus* in the Canary Islands shows patterns and rates of diversification that reflect  
51 island topographic complexity and geological dynamism. Although modest in species diversity,  
52 this radiation is atypical in diversification on a single host plant species, but typical in the  
53 primary role of allopatry in the diversification process.

54

55 **Key words:** cladogenesis, host plant association, host specificity, island colonization, *Percyella*  
56 radiation, phylogeny, speciation

57

58

## 59 **Introduction**

60

61 The Macaronesia ~~region~~ is considered an exemplary natural model ~~system~~ for studying  
62 colonization and speciation in plant and arthropod lineages (Juan et al., 2000; Emerson, 2002;  
63 Whittaker & Fernández-Palacios, 2007; Illera et al., 2016). Species richness in this region, as  
64 with other oceanic archipelagos, is the result of a number of factors such as rates of  
65 colonization, extinction, and in situ adaptive radiation that, in turn, are determined by dispersal  
66 ability, niche availability, climatic fluctuations, geological disturbance and geographical barriers  
67 (MacArthur & Wilson, 2001; Emerson, 2008; Gillespie et al., 2012). Other influential aspects  
68 specific to each region such as local geology and climate history and the extent of geographical  
69 isolation of individual islands is also fundamental to understanding the evolution of species  
70 richness in each archipelago.

71

72 The Macaronesian biogeographical region encompasses four major archipelagos plus  
73 the smaller Selvagens archipelago, with the centrally positioned Canary Islands (seven islands),  
74 Madeira (two islands) and Selvagens (three islands) referred to as central Macaronesia. All  
75 archipelagos are considered of oceanic volcanic origin (Geldmacher et al., 2005), but the  
76 number and placement of volcanic plumes responsible for the aerial islands remains debated,  
77 particularly for the complex geological parts of the Canarian archipelago (van den Bogaard,  
78 2013; Negrodo et al., 2022). In terms of biodiversity, the central Macaronesian archipelagos  
79 share several characteristics with other Pacific oceanic archipelagos, such as the Galapagos and  
80 Hawaiian Islands, including a high level of endemism; e.g. in the Canary Islands, 45% of the  
81 arthropod fauna and 40% of the native vascular flora are endemic (Arechavaleta et al., 2010;  
82 Beierkuhnlein et al., 2021; Gobierno de Canarias, 2023).

82

83 However, Macaronesian archipelagos differ in having a considerably wider geological  
84 age range, varying from 0.25 million years (Mya) for Pico (Azores) to 29 Mya for Salvagem  
85 Pequena (Selvagens Islands). This region also has a closer proximity to continental sources of  
86 colonization, and consequently higher levels of immigration (Juan et al., 2000). One of the  
87 easternmost of the Canary Islands, Fuerteventura, is only around 100 km from the northwest  
88 coast of the African continent and was even closer, around 65 km, during periods of glaciation

88 (García-Talavera, 1997, 1999; Carine et al., 2004). Furthermore, the presence of seamounts  
89 located between islands and between archipelagos and the continent may have facilitated  
90 historic dispersal, both from the continent and between islands, serving as steppingstones  
91 during glacial periods when sea levels were lower (García-Talavera, 1997; Fernández-Palacios et  
92 al., 2011; Caujapé-Castells et al., 2017). It is therefore not surprising that most of the endemic  
93 Macaronesian flora and fauna has its closest relatives in nearby continental regions and a large  
94 number of Macaronesian endemics are shared between two or more archipelagos; the Canary  
95 Islands and Madeira being the islands sharing the largest number of endemic species (Carine et  
96 al., 2004; Sanmartín et al., 2008; Fernández-Palacios, 2010). Nevertheless, some groups display  
97 unusually disjunct distributions, for example, some elements of the flora and fauna have sister  
98 taxa in the east Mediterranean, Eurosiberia, East Asia, East Africa, South Africa, and the New  
99 World (Carine et al., 2004; Carine, 2005; Sharma et al., 2011; Neiber et al., 2021; Davranoglou  
100 et al., 2022).

101       Psyllids or jumping plant-lice (Psylloidea) are a model system for studying island  
102 biogeography and evolutionary processes in conjunction with host plant selection as they are  
103 highly host specific phytophagous insects (Percy et al., 2004; Burckhardt, 2005; Hodkinson,  
104 2009; Ouvrard et al., 2015). Most of the species feed on either one (monophagous) or a few  
105 related plant species (oligophagous) (Ouvrard et al., 2015). In general, studies have shown  
106 positive correlations between the diversity of phytophagous insects and host plants (Lin et al.,  
107 2015; Forbes et al., 2017; Jusselin & Elias, 2019; Bruzese et al., 2019), with examples of insect  
108 speciation occurring in the absence of host plant diversification being rarer (Nyman et al. 2010).  
109 A common driver of speciation among phytophagous insects, including psyllids, is adaptation to  
110 different host plant species (Burckhardt & Basset, 2000; Janz et al., 2006; Ouvrard et al., 2015;  
111 Richards et al., 2015; Kemp & Ellis, 2017). Most diversification in Macaronesian psyllids follows  
112 this typical process with speciation involving switching to closely related plant species (e.g.,  
113 Percy, 2003b), and hence, extent of in situ diversification in psyllid lineages partly depends on  
114 diversity in the host plant lineage. Similarly, successful colonization and establishment will  
115 depend on locating both familiar and unoccupied host plants (Percy et al., 2004; Percy, 2010).  
116 Examples of **phytophagous insect** species radiations occurring on a single host plant species,

117 particularly in sympatry, are rare (e.g., Joy & Crespi, 2007; Percy, 2017, 2018). The recent  
118 description of an endemic psyllid genus in the Canary Islands that has radiated on a single,  
119 endemic Canary Island plant, *Convolvulus floridus* (Convolvulaceae), provides an example of this  
120 less common scenario (Bastin et al., 2023). However, ~~although atypical in occurring on a single~~  
121 ~~host,~~ the radiation of *Percyella* Bastin, Burckhardt & Ouvrard on *C. floridus* appears to be a  
122 textbook example of allopatric speciation, whereby each of the four psyllid species is found on  
123 *C. floridus* but on a separate island. This scenario also conforms to most records of closely  
124 related species that diversify on the same plant occurring in allopatry (Percy, 2003b; Jousselin  
125 et al., 2013).

126         There are around 4000 described psyllid species worldwide (Burckhardt et al., 2021) and  
127 they are found in all biogeographic realms except Antarctica, with their greatest diversity in  
128 tropical and south temperate regions (Hollis, 2004; Hodkinson, 2009). Previous studies have  
129 revealed a wide taxonomic diversity of psyllid lineages in Madeira and the Canary Islands  
130 (Loginova, 1976; Hodkinson, 1990; Aguiar & Martin, 1999; Aguiar et al., 2019; Percy, 2003a),  
131 and a recent survey described two new genera and 16 new species from the Canary Islands  
132 (Bastin et al., 2023). Of the 73 species recorded for the central Macaronesian islands (Aguiar et  
133 al., 2019; Bastin et al., 2023), there are 58 native species in 17 genera in four of the seven  
134 recognized families (Burckhardt et al., 2021) (Table 1). There is a high level of endemism that is  
135 particularly notable for the Canary Islands when compared with other Sternorrhyncha higher  
136 groups: <1%, 19%, 24%, 66% of the Aphidomorpha, Coccoomorpha, Aleyrodidae, and Psylloidea  
137 are endemic respectively (Gobierno de Canarias, 2023, Bastin et al., 2023).

138         The total number of native Canarian psyllids is currently 51 species of which more than  
139 80% are endemic (41 species) (Bastin et al., 2023), while Madeira has 12 native psyllid species  
140 of which 50% are endemic (Aguiar et al., 2019) (Table 1). Four native species are currently  
141 considered to be central Macaronesian endemics and are found on both archipelagos. Two  
142 genera are endemic, the monotypic *Megadicrania* Loginova (Liviidae) found on Gran Canaria  
143 and Tenerife, and *Percyella* (Triozidae). The largest endemic radiation is represented by the  
144 legume-feeding *Arytinnis* Percy (Loginova, 1976; Percy, 2003a, 2003b), with more modest in  
145 situ diversification found in three genera, *Arytaina* Foerster, *Drepanoza* Bastin, Burckhardt &

146 Ouvrard and *Percyella* (Loginova, 1976; Percy, 2003a; Bastin et al., 2023). The majority of the  
147 native central Macaronesian taxa are found on the larger and more diverse archipelago of the  
148 Canary Islands (Table 1). The majority of the native Macaronesian species, including more than  
149 half the Canary Island native species (29 species in six genera) are in the family Psyllidae. Of the  
150 62 species recorded from the Canary Islands, 11 are non-native and these are from nine genera  
151 (Table 2).

152 Few psyllids have been recorded from the low, drier, eastern islands, and most are  
153 considered non-native (three species) or native non-endemic (two species). In the case of  
154 historic records for two native legume-feeding species (*Arytaina devia* Loginova and *Arytinnis*  
155 *proboscidea* (Loginova) recorded from Fuerteventura (Loginova, 1976), these are single  
156 individual records with no known host plants recorded on the island and therefore the records  
157 remain to be confirmed (indicated by [?] in Table 1). Only two native psyllid species have been  
158 recorded on Fuerteventura and Lanzarote, *Colposcения viridis* Loginova and *Diaphorina*  
159 *continua* Loginova, despite host plants of other native psyllids occurring natively on all or some  
160 of the eastern islands (e.g., *Rhamnus crenulata*, *Convolvulus floridus*, *Gymnosporia cassinoides*,  
161 *Picconia excelsa*, *Pistacia atlantica* and *Olea cerasiformis*) (Gobierno de Canarias, 2023).

162 Confirmed distributions for all endemic and most native species are therefore found only on  
163 the five higher elevation central and western islands, particularly the two central islands (Gran  
164 Canaria and Tenerife) where 15 of the 16 native genera representing 76% of the native species  
165 are recorded. The western islands (La Gomera, La Palma and El Hierro) have 43% of the native  
166 species in nine genera. Tenerife is both the largest island and the highest with an elevation of  
167 3717m, and this island has the highest richness of native psyllids, with all genera except  
168 *Arytainilla* Loginova and *Spanioza* Enderlein represented, and around 60% of native psyllid  
169 species. Thereafter, in decreasing order, Gran Canaria, La Palma, La Gomera and El Hierro have  
170 39%, 30%, 27% and 8% native species respectively. All native species on the smallest and most  
171 westerly island of El Hierro also occur on La Palma. Five genera (*Drepanoza*, *Lisronia* Loginova,  
172 *Agonoscena* Enderlein, *Spanioza* and *Megadicrania* Loginova) are only found on the central  
173 islands. Eight genera (*Arytaina*, *Arytinnis*, *Cacopsylla* Ossiannilsson, *Euphyllura* Foerster,  
174 *Lauritrioza* Conci & Tamanini, *Livilla* Curtis, *Strophingia* Enderlein and *Percyella*) are found on

175 both central and western islands, but only *Arytaina* and *Arytinnis* are present on all five islands.  
176 Lastly, *Arytainilla* has only been recorded from the western island of La Palma. Only four native  
177 species are recorded from both the Canary and Madeira archipelagos (*Cacopsylla atlantica*  
178 (Loginova), *C. exima* (Loginova), *Euphyllura canariensis* Loginova, and *Lauritrioza laurisilvae*  
179 (Hodkinson)), and these species all appear to be occupying the same host niche on both  
180 archipelagos (Bastin et al., 2023).

181 The objectives of this study are: 1) establish the phylogenetic placement of central  
182 Macaronesian lineages within the superfamily Psylloidea; 2) estimate the number of  
183 colonization events required to explain the diversity of psyllids in these islands; 3) interpret  
184 patterns of island-continent host plant associations; 4) characterize the biogeographic and  
185 population structure in the radiation of *Percyella* on *Convolvulus floridus*.

186  
187

## 188 **Materials and Methods**

189

### 190 **Sampling**

191 Our molecular survey represents all native psyllid lineages in the central Macaronesian islands  
192 except *Rhodochlanis* Loginova (Table 1). In addition to the seven lineages (nine species)  
193 represented in Percy et al. (2018), we sampled 35 of the 58 native species found in central  
194 Macaronesia. Of the 51 native species in the Canary Islands, the only species not in our  
195 sampling are *Colposcencia viridis*, *Diaphorina continua*, *Drepanoza montanetana* (Aguiar), the  
196 undescribed species of *Spanioza*, and some of the 18 species from the *Arytinnis* radiation  
197 (analyzed previously in Percy 2003b); *Agonoscena cisti* (Puton) and *Euphyllura olivina* (Costa)  
198 although not sampled from the Canary Islands are sampled from Spain. Twenty-one species (12  
199 native and nine introduced) are recorded from Madeira (Aguiar et al., 2019), and all but three  
200 of the native species are represented in our data. In addition, we sampled or included data for  
201 13 of the 15 confirmed introduced Macaronesian species (Table 2). Specimens were either field  
202 collected by SB during this study or obtained from previous collections made by DP and others;  
203 field sampling was performed from 1997-2023. Field sampled material was collected by sweep  
204 netting or aspirated directly from the host plant; specimens were then transferred live into 90-

205 95% ethanol and stored at -20 °C. In a few cases, if adults were not observed on the host plant,  
206 leaves with either larvae or galls were transferred to a plastic box and kept at room  
207 temperature until adult emergence. Host plant associations in most cases were confirmed by  
208 observation of last stage immatures (see Bastin et al., 2023). Tables 1 and 2 show details of all  
209 taxa recorded from central Macaronesia and whether molecular data was obtained. Details of  
210 non-Macaronesian taxa used in the molecular analyses are given in Supporting Information  
211 Table S1. Three continental taxa, *Drepanoza lienhardi* (Burckhardt), *Cacopsylla alaterni*  
212 (Foerster) and *C. myrthi* (Puton), were sampled from dry pinned material provided by Daniel  
213 Burckhardt (Naturhistorisches Museum, Basel); and a specimen of *Strophingia ericae* (Curtis)  
214 (JHM6411) collected in 1994 was obtained from the Natural History Museum, UK; the sequence  
215 for *Agonoscena pistaciae* Burckhardt & Lauterer was obtained from GenBank KP192847, and  
216 sequence data for an undescribed *Agonoscena* sp. from Greece was obtained from Artemis  
217 Database (INRAE-CBGP, 2023) (Specimen code: CCOC11846\_0202).

218 Two of the *Percyella* taxa (*P. guanche* Bastin, Burckhardt & Ouvrard and *P. benahorita*  
219 Bastin, Burckhardt & Ouvrard) from the radiation on *Convolvulus floridus* were initially collected  
220 in the Canary Islands by DP in 1998, two additional taxa were discovered during extensive  
221 sampling across Gran Canaria, Tenerife, La Gomera and La Palma by SB between 2018 and  
222 2022. *Convolvulus floridus* was also surveyed in Lanzarote, but no adults, immatures or galls  
223 were found. *Percyella* specimens were collected from five sites in La Gomera, eight in La Palma,  
224 eight in Tenerife and three in Gran Canaria. Site locations are detailed in Table 3. Additionally,  
225 all nine endemic species of *Convolvulus* in the Canary Islands were surveyed (see Supporting  
226 Information Table S2) to confirm distribution of psyllids on this host genus.

227 Host plants in the Canary and Madeira islands, if known, are given in Tables 1 and 2. The  
228 host plant taxonomy follows that given in WFO (World Flora Online) for Madeira species and  
229 Gobierno de Canarias (2023) for Canary Island species. The taxonomy of genistoid legumes is in  
230 flux (e.g., with regard to recognition of a paraphyletic *Teline* nested within *Genista* sensu lato  
231 (Percy & Cronk, 2002), and different specific epithets used for *Chamaecytisus proliferus* sensu  
232 lato) and in these cases we have elected to follow taxonomic names preferentially used in  
233 Macaronesia.



234

### 235 **Molecular procedures and sequencing**

236 Non-destructive DNA extraction protocols using whole individual specimens were performed  
237 with either the Chelex protocol (following Casquet et al., 2012) or the Qiagen Blood and Tissue  
238 Kit (Qiagen) (following Percy et al., 2018). DNA voucher specimens were preserved in ethanol  
239 and deposited in Instituto Canario de Investigaciones Agrarias (Valle de Guerra, Spain) or  
240 retained in DPs personal collection (DMPC, University of British Columbia). The mitochondrial  
241 region of cytochrome oxidase 1 (cox1) was amplified for the majority of taxa using either  
242 primer pairs, LCOP-F and HCO-2198 (length 658 bp), or mtd6 and H7005P-R (length 850 bp). In  
243 a few cases, specimens that failed to amplify with these two primer pairs (<5 % of specimens)  
244 were amplified with tRWF1 and LepR1 (length ~860 bp) or mtd6 and mtd9 (length 472 bp) (see  
245 Bastin et al. in press). All primer details, combinations and references are given in Table 4. An  
246 additional mitochondrial region, cytochrome B (cytb, length 385 bp) was amplified with primers  
247 cytBF and cytBR (Percy et al., 2018). For most of the species, these gene regions were obtained  
248 from the same individual, but in a few cases from different individuals from the same collection  
249 event, and in three instances sequences were obtained from different populations on the same  
250 island; in only one instance (for *Megadicrania tecticeps* Loginova) were sequences obtained  
251 from populations on different islands. PCR amplification was performed in a 25 µl final reaction  
252 volume containing 0.4 µM of each primer, 3 mM MgCl<sub>2</sub>, NH<sub>4</sub> buffer (1×), 0.2 mM of each dNTP,  
253 0.4 mg/ml of acetylated bovine serum albumin (BSA), 0.02 unit/µl of Taq-polymerase (Bioline)  
254 and 2 µl of DNA extract (concentration not determined). Polymerase chain reactions (PCRs)  
255 were carried out in Swift™ Maxi Thermal Cyclers (ESCO Technologies) applying the following  
256 thermal step: initial denaturation for 4 min at 94°C, followed by 39 cycles of 30 s at 94°C, 30 s at  
257 annealing temperature of 50-56°C (see Table 4), and 45 s at 72°C, with a final extension step of  
258 10 min at 72°C. PCR products were enzymatically cleaned with 0.025 unit/µl rApid alkaline  
259 phosphatase (Roche) and 50 unit/ml exonuclease I (BioLabs) for 15 min at 37°C followed by 15  
260 min at 95°C. The purified products were sequenced in both directions at Macrogen Inc.  
261 (Madrid, Spain), or Eurofins (Kentucky, USA). Additional PCR amplifications, including using  
262 older dry material (> 10 years old), were performed following protocols described in Percy et al.

263 (2018). Sequences were checked, edited, and assembled with CLUSTALW (Thompson et al.,  
264 1994) within the MEGA 7 software (Kumar et al., 2016). DNA sequences are deposited in  
265 GenBank with accession numbers XXXXXXXXX-XXXXXXX (cox1) and XXXXXXXXX-XXXXXXX  
266 (cytb).

267

## 268 **Phylogenetic analyses**

269 Phylogenetic analysis to place 60 species (both Macaronesian and outgroup) within the  
270 Psylloidea ~~superfamily~~ tree employed a maximum likelihood (ML) constraint analysis run with  
271 RAxML (v. 8.2.12) (Stamatakis, 2014) on the CIPRES Science Gateway (Miller et al., 2010). The  
272 constraint tree employed was the total evidence tree obtained from mitogenome data  
273 presented in Percy et al. (2018). The constraint tree option allows the user to specify an  
274 incomplete multifurcating constraint tree for the RAxML search. Initially, multifurcations are  
275 resolved randomly and the additional taxa are added using a maximum parsimony criterion to  
276 compute a comprehensive (containing all taxa) bifurcating tree (Stamatakis, 2014). This tree is  
277 then further optimized under ML criteria respecting the given constraints with the added taxa  
278 unconstrained (i.e., can be placed in any part of the tree). Data partitions were specified for  
279 codon position and RNA regions, and ML search criteria employed model GTRCAT, 1000 rapid  
280 bootstraps, and Gamma optimization of tree space. In order to maximize the power of this  
281 method to place shorter sequences correctly within the Psylloidea phylogeny, we used both  
282 cox1 and cytb regions where available.

283 To further investigate placement of taxa and relationship to outgroups for genera  
284 *Drepanoza* and *Percyella*, we selected related outgroup taxa from within Group A in Percy et al.  
285 (2018) (Table 3). For *Percyella* species, multiple sites were surveyed across four islands (Table  
286 3). We used a cox1 dataset (1216 bp in length, 419 variable characters of which 344 are  
287 parsimony informative, 105 informative within *Drepanoza*, and 171 informative within  
288 *Percyella*) and performed three phylogenetic analyses using neighbor-joining (NJ) with PAUP\*  
289 v4.0a (Swofford, 2003), maximum likelihood (ML) with RAxML (with the same parameters as  
290 specified for the Psylloidea analysis but minus a tree constraint), and Bayesian inference (BI)  
291 using the BEAST v2.7.3 package (Bouckaert et al., 2019). Three identical sequences in *Percyella*

292 were removed from the dataset used for ML and BI analyses. The NJ method with all 50  
293 sequences was performed with uncorrected (p) distances in PAUP\* (Swofford 2003), and clade  
294 support was obtained with a NJ bootstrap analysis (1000 replicates), this method was also used  
295 to estimate the maximum intraspecific genetic divergences reported in Table 3. The ML and BI  
296 analyses used specified data partitions for codon position and the noncoding tRNA-W region.  
297 Five additional taxa from the Hawaiian *Pariaconus* Enderlein radiation were added for the  
298 Bayesian dating analyses to test consistency across the calibrated tree with island ages. For the  
299 dating analyses, in addition to the four data partitions, substitution rates were estimated,  
300 Gamma count set to 4, and substitution model set to HKY with empirical frequencies; a strict  
301 clock model was used as the data are from a single mitochondrial region and assumed to be  
302 clock-like; tree prior used Calibrated Yule Model with Uniform birthRate parameter (using  
303 Gamma birthRate parameter produced near identical results). To calibrate the trees, we used  
304 internal calibration nodes with monophyly enforced as MRCA (most common recent ancestor)  
305 priors. Four internal node calibration priors were used, three of these in the Hawaiian  
306 *Pariaconus* radiation where sister taxon pairs on three islands had previously been studied (on  
307 Kauai, Oahu, and Hawaii islands) (Percy, 2017; Percy et al., 2018), the fourth calibration was La  
308 Palma island which has a comparably well defined geological age within the Canaries (whereas  
309 older islands in the Canaries have more complex geological histories and a wider age range of  
310 geological formations). In addition, La Palma was found to have the highest haplotype diversity  
311 within *Percyella*. Age calibration analyses were run in the following combinations: using only La  
312 Palma, using only Kauai, using all three Hawaiian islands. We set the age priors using a normal  
313 distribution and set the mean so that the 95% upper range was at the maximum geological  
314 island age. Thus, island calibration priors were set as follows: La Palma with a mean age of 1.8  
315 Mya (million years ago) and 95% range of 1.64-1.96 Mya; Kauai with a mean age of 4.8 Mya and  
316 95% range of 4.64-4.96 Mya; Oahu with a mean age of 3.5 Mya and 95% range of 3.34-3.66  
317 Mya; Hawaii with a mean age of 0.8 Mya and 95% range of 0.64-0.96 Mya. We used a MCMC  
318 (Markov chain Monte Carlo) chain length of 25 million, tracelog and treeelog set to 1000, and a  
319 10% burnin. Tracer v1.7.2 (Rambaut et al., 2018) was used to check chain convergence and ESS  
320 (effective sample size) values. Increasing the MCMC chain length from 10 million to 25 million

321 was required to obtain satisfactory ESS values (> 500) for all parameters. The age calibrated  
322 tree was visualized with FigTree v1.4.4 (Rambaut 2018) showing 95% HPD (highest posterior  
323 density interval) bars on the nodes.

324 To further explore and characterize biogeographic and population level patterns in the  
325 *Percyella* radiation of four closely related species, haplotype variation in the four species across  
326 the four islands was analysed using PopART v1.7 (Leigh & Bryant, 2015). The 50 *cox1 Percyella*  
327 sequences were used to create a haplotype median-joining network (Bandelt et al., 1999) and  
328 haplotype map. Geotags for each sequence enabled geographic clustering by the k-means  
329 algorithm, with a centroid georeference for each island. Basic population structure was  
330 assessed from a simple AMOVA (analysis of molecular variation) as a proportion of nucleotide  
331 diversity between and within populations of the four species. Due to variation in sequence  
332 length across the 50 *Percyella* sequences as a result of amplification with different primer  
333 combinations, the haplotype analysis was done with only the 280 bp shared across all  
334 individuals, whereas the NJ (and genetic distances reported), ML, and BI analyses used the full  
335 length sequences.

336

337

## 338 **Results**

339

### 340 **Phylogenetic placement of Macaronesian lineages within Psylloidea and estimated number of** 341 **colonization events**

342 The ML backbone constraint analysis provides a best estimate of the phylogenetic placement of  
343 the central Macaronesian taxa in the broader Psylloidea phylogeny. Placement of the native  
344 psyllid genera indicates that central Macaronesian lineages are distributed throughout the  
345 Psylloidea tree (Fig. 1). With reference to the groups determined by Percy et al. (2018), native  
346 Macaronesian taxa are in families: Triozidae, within Group A (*Drepanoza* spp., *Percyella*), and  
347 Group B (*Lauritrioza laurisilvae*); Psyllidae, within Group O (*Cacopsylla* spp.), Group P (*Arytaina*,  
348 *Arytainilla*, *Arytinnis*, *Livilla*), and Group BB (*Diaphorina gonzalezi* Bastin, Burckhardt &  
349 Ouvrard); Liviidae, within Group FF (*Euphyllura* spp., *Megadicrania tecticeps*, *Strophingia* spp.);

350 and Aphalaridae within Group JJ (*Agonoscena* spp., *Lisronia echidna* Loginova). Within these  
351 major groups, placements within subgroups are moderately to well supported (with bootstrap  
352 >80%) with the exception of *Drepanoza* where placement of this genus is topologically stable  
353 but remains unconfirmed due to lack of bootstrap support (Fig. 1). The placement of *Drepanoza*  
354 near *Percyella* and *Spanioza* within Group A is also supported morphologically (Bastin et al.,  
355 2023).

356

357 **Figure 1. Maximum likelihood analysis of the superfamily Psylloidea using the mitogenome**  
358 **data published in Percy et al. (2018) as a backbone tree constraint and additional sequences**  
359 **from this study added (see text, Tables 1-3).** The estimated number of independent  
360 colonizations/introductions for native and **introduced** taxa in the central Macaronesian islands  
361 are indicated by square/triangle symbols. For systematic placement, names in bold indicate  
362 sequence data was used in our analysis, and non-bold indicates no sequence data available so  
363 placement inferred by congeneric taxa; phylogenetically closest taxon in [ ] for well supported,  
364 or [?] if support is less than 80% bootstrap. Insets show taxon placement for native  
365 Macaronesian taxa (box colour indicates psyllid family); taxon names in bold indicate short  
366 sequences placed in the mitogenome backbone phylogeny.

367

368 The native psyllid fauna of the central Macaronesian islands has resulted from an  
369 estimated 26 independent colonization events (Fig. 1). More than half of these colonizations,  
370 18, are represented by a single native taxon, in other words no further cladogenesis. Three of  
371 the colonization events resulted in limited cladogenesis (with two native sister taxa), and five  
372 resulted in further cladogenesis that can be characterized as either modest or substantial  
373 species radiations. The colonization event that gave rise to the genus *Arytinnis* represents the  
374 only large psyllid radiation with 18 endemic Macaronesian species (Percy, 2003a, 2003b). Four  
375 other groups have undergone modest radiations. Two of these are exclusively in the Canary  
376 Islands: *Percyella* with four species, each native to a different island (further explored below),  
377 and **Arytaina** with two or three native species resulting per colonization (Fig. 1). *Drepanoza* is  
378 interpreted as colonizing Macaronesia twice, resulting in two or three native species per

379 archipelago (Figs 1 and 2). The placement of the only continental species in *Drepanoza* (*D.*  
380 *lienhardi*) among the island species, is not straightforward to interpret at this time due to lack  
381 of resolution; an alternative scenario to multiple colonizations of Macaronesia by *Drepanoza* is  
382 a back colonization from island to continent. There is a potential Macaronesian radiation of four  
383 species of *Strophingia*, but the pattern is unusual as sister taxon pairs are found on different  
384 archipelagos, requiring two cladogenic events between the Canaries and Madeira: *Strophingia*  
385 *fallax* Loginova from Madeira groups strongly (100%) with *Strophingia paligera* Bastin,  
386 Burckhardt & Ouvrard from the Canary Islands, and *Strophingia arborea* Loginova from Madeira  
387 groups strongly (100%) with *Strophingia canariensis* Bastin, Burckhardt & Ouvrard from the  
388 Canary Islands. However, morphological evidence suggests *Strophingia paligera* may be close to  
389 a continental species, *S. cinerea* Hodkinson, while the immature morphology of *S. canariensis* is  
390 most similar to that of another continental species, *S. proxima* Hodkinson (Bastin et al., 2023);  
391 all species feed on *Erica* spp. and the continental species occur in the Western Mediterranean  
392 but are not sampled in our analysis. It is therefore possible that multiple colonizations account  
393 for *Strophingia* in Macaronesia, but this remains to be tested. The only other inter-archipelago  
394 cladogenic event recorded is in a previous study of *Arytinnis*, where the two Madeira species  
395 are nested within the Canary Island radiation, but in this case, it is uncertain whether the  
396 cladogenic event was via colonization directly from the Canary Islands to Madeira, or via a back  
397 colonization to the continent (Percy, 2003b).

398         Of the four species that occur in both Canary and Madeira archipelagos, we only include  
399 samples from both archipelagos for *Euphyllura canariensis* and *Cacopsylla atlantica* (Fig. 1). In  
400 both cases, intraspecific genetic divergence was moderately high between archipelagos (cox1:  
401 3.5% and 2.0% respectively) indicating that both species have non-interbreeding and diverging  
402 populations on these archipelagos; some morphological variation between archipelagos was  
403 observed for *E. canariensis* but not as to support recognition of separate sister species (Bastin  
404 et al., 2023).

405         The 15 introduced species recorded for central Macaronesia are from eight major  
406 phylogenetic groups (Fig. 1). A number of these taxa are worldwide invasives encountered in  
407 many different parts of the world (e.g., *Acizzia uncatoides* (Ferris& Klyver), *Cacopsylla fulguralis*

408 (Kuwayama), *Ctenarytaina eucalypti* (Maskell), *Glycaspis brimblecombei* Moore, *Heteropsylla*  
409 *cubana* Crawford, and *Macrohormotoma gladiata* Kuwayama). Others are more localized  
410 introductions from Europe and Mediterranean regions (e.g., the *Bactericera* Puton spp.,  
411 *Cacopsylla pyri* (Linnaeus), *Heterotrioza chenopodii* (Reuter), and *Trioza urticae* (Linnaeus)) (see  
412 Bastin et al., 2023).

413

#### 414 **Insights from host plant associations**

415 Our backbone constraint analysis (Fig. 1) provides evidence for, and in most cases confirmation  
416 of systematic placement of all included island taxa. This phylogenetic framework provides  
417 insights on host plant associations by comparing host associations in closely related species, as  
418 follows:

419 *Lauritrioza laurisilvae* on *Laurus novocanariensis* groups strongly with a continental  
420 Lauraceae feeding species, *Lauritrioza alacris* (Flor), found on *Laurus nobilis* as well as other  
421 Lauraceae species.

422 The three endemic *Cacopsylla* species on *Rhamnus* hosts represent two independent  
423 colonization events, and all three species group with continental species on *Rhamnus*; the  
424 endemic *Cacopsylla crenulatae* Bastin, Burckhardt & Ouvrard on *Rhamnus crenulata* groups  
425 with strong support (96%) with continental *C. myrthi*, and these group with continental *C.*  
426 *alaterni* (90%). The other endemic *Cacopsylla*, *C. falcicauda* Bastin, Burckhardt & Ouvrard and *C.*  
427 *exima*, both on *Rhamnus glandulosa*, are only moderately supported (82%) as sister taxa, and  
428 all of these *Rhamnus*-feeding *Cacopsylla* together group with a continental species on  
429 *Rhamnus*, *C. rhamnicola* (Scott) (96%). The fourth Macaronesian endemic *Cacopsylla*, *C.*  
430 *atlantica*, is found on *Salix canariensis*, a Macaronesian endemic tree, and is strongly supported  
431 (100%) as grouping with a continental species, *C. saliceti* (Foerster) on *Salix* spp. hosts.

432 Of the genistoid legume feeding group, *Arytainilla serpentina* Percy on *Spartocytisus*  
433 *filipes* is strongly supported (100%) grouping with a continental species, *A. spartiophila*  
434 (Foerster), on host *Cytisus scoparius*. The five *Arytaina* species represent two independent  
435 colonizations resulting in two or three species, and each of these lineages group with  
436 continental *Arytaina* spp. on Genisteeae hosts. The 18 *Arytinnis* species represent the largest

437 monophyletic group resulting from a single colonization event and group with continental *Livilla*  
438 spp. on Genisteae hosts. The only member of *Livilla*, *Livilla monospermae* Hodkinson, also  
439 groups strongly (100%) with *Livilla* spp. on Genisteae hosts.

440 *Diaphorina* is a large genus and only a relatively small sampling is included in our  
441 analysis, nevertheless, *D. gonzalezi*, which is found on the endemic host plant, *Gymnosporia*  
442 *cassinoides* (Celastraceae), groups strongly (100%) with *Diaphorina gymnosporiae* Mathur, a  
443 species from South Asia also found on *Gymnosporia* spp. This is the only large scale geographic  
444 disjunction evident for the Macaronesian psyllid taxa, all other lineages have continental  
445 relatives from near or adjacent continental regions.

446 The *Strophingia* species group strongly (92%) with a continental species, *S. ericae*, and  
447 all taxa feed on Ericaceae (see previous section on inter-archipelago colonizations).

448 The three species of *Euphyllura* are considered native (two endemic), with each  
449 representing a separate colonization event. All three species have host plants in the family  
450 Oleaceae. *Euphyllura confusa* (known only from Tenerife) groups strongly (100%) with a  
451 Mediterranean species occurring natively in Macaronesia (on Gran Canaria), *Euphyllura olivina*,  
452 and both are found on cultivated olive trees, *Olea europaea*. The short branch length and  
453 sequence divergence (cox1: 3.8%) between these species (Fig. 1), as well as minimal  
454 morphological differentiation (Bastin et al., 2023) suggest that *Euphyllura confusa* Bastin,  
455 Burckhardt & Ouvrard represents a relatively recent diversification on the archipelago. In  
456 contrast, *Euphyllura canariensis* on host *Picconia excelsa* is not strongly supported grouping  
457 with a particular taxon in our sampling.

458 The four *Agonosцена* species are all considered native (two endemic and two non-  
459 endemic), and likely each represent independent colonization events. Despite the strongly  
460 supported (92%) grouping and relatively recent divergence of *A. sinuata* (an endemic species on  
461 host plant *Ruta pinnata* (Rutaceae)) with *A. targionii* (a widespread Western Palaearctic species  
462 on *Pistacia lentiscus* (Anacardiaceae)), it seems unlikely this divergence represents an insular  
463 Macaronesian speciation event with back colonization to the continent by *A. targionii*. The  
464 other endemic species, *A. atlantica* Bastin, Burckhardt & Ouvrard, is also strongly supported  
465 (92%) grouping, but with greater sequence divergence, with a continental species, *A. pistaciae*;



466 and these in turn group (but with weak support) with *A. cisti*, which is another widespread  
467 Western Palaearctic species occurring natively in Macaronesia. Interestingly, the host plant for  
468 all *Agonoscena* species in our analysis except *A. sinuata* Bastin, Burckhardt & Ouvrard is *Pistacia*  
469 (*Anacardiaceae*), and only one other *Agonoscena* species is known from *Ruta* or *Rutaceae* (*A.*  
470 *succincta* (Heeger) occurring in the Mediterranean). Wider sampling of *Agonoscena* would  
471 clarify our interpretation, but at least one host switch from *Anacardiaceae* to *Rutaceae* has  
472 occurred with this switch possibly concurrent with colonization of the Canary Islands for *A.*  
473 *sinuata*; both host families are in the *Sapindales*.

474 The monotypic endemic genus *Megadicrania* is found on an endemic tree, *Olea*  
475 *cerasiformis* as well as on cultivated olive trees, *Olea europaea*, and is well supported (96%)  
476 within subfamily *Euphyllurinae* which includes other species on *Olea*, but no support for the  
477 generic placement within the subfamily was recovered.

478 *Lisronia echidna* on *Cistus monspeliensis* (*Cistaceae*) is strongly supported (92%) as  
479 grouping with *Rhinocola aceris* (Linnaeus) on *Acer* (*Sapindaceae*); and this is one of the few  
480 instances where the host plant association is not readily predicted by hosts associations in  
481 continental relatives. The endemic genus *Percyella* and the genus *Drepanoza* are the other  
482 examples where the island hosts are not readily predictable (see following section).

483

#### 484 **Additional analyses to determine the origins of *Drepanoza* and *Percyella***

485 All three analyses of the *cox1* data alone (NJ, BI, ML; Fig. 2 and Supporting Information Figs S1-  
486 S3) strongly support the monophyly of both *Drepanoza* and *Percyella* and provide moderate to  
487 strong support for grouping *Drepanoza*, *Percyella*, *Dyspersa* Klimaszewski, *Spanioza*, and  
488 *Hemitrioza* Crawford together as a subgroup within Group A but without consistent support for  
489 a specific generic grouping within this subgroup. *Percyella* groups moderately strongly (90%) as  
490 sister to a group with configuration (*Dyspersa*, *Hemitrioza*, *Spanioza*) in the *Psyloidea* backbone  
491 analysis, and in all our analyses *Percyella* and *Drepanoza* appear topologically close. One  
492 species of *Percyella* (*P. benahorita*) was included in the original mitogenome data (Percy et al.,  
493 2018) but no members of *Drepanoza* are in the backbone phylogeny, and this may contribute to

494 the uncertainty in placing *Drepanoza* in the backbone analysis, as our placement relies entirely  
495 on the short cox1 and cytb sequences.

496

497 **Figure 2. Bayesian inference dating analysis using cox1 data for *Percyella* and *Drepanoza* with**  
498 **age priors on three nodes (red node bars) in the Hawaiian *Pariaconus* radiation in order to**  
499 **date the Macaronesian *Percyella* and *Drepanoza* genera (see text).** Node bars indicate 95%  
500 HPD with mean age given in bold above nodes. Support values: BI/ML are given below nodes  
501 (individual BI and ML trees are provide in Supporting Information Figs S2 and S3). Vertical bars  
502 for *Percyella* species use the same colour scheme as mapped in Fig. 3; asterisks indicate  
503 individuals interpreted as transported between islands. Three instances of identical sequence in  
504 *Percyella* were not included in the analysis but individual sample codes indicate their  
505 placement. *Drepanoza* consists of species endemic to Madeira (dark grey boxes), Canary Islands  
506 (light grey box), and one continental species (*D. lienhardi*).

507

508 *Drepanoza* in the Canary Islands has two species on *Convolvulus* (Convolvulaceae) and  
509 one species on *Withania* (Solanaceae); both host families are in the Solanales. Two additional  
510 *Drepanoza* taxa on Madeira are hosted by *Pittosporum* (Pittosporaceae) in the Apiales. These  
511 different host groups for *Drepanoza* may each reflect an independent colonization of  
512 Macaronesia, but taxa on the same host family do not always group together. Within  
513 *Drepanoza*, the cox1 analyses group the two Canary Islands taxa on *Convolvulus* hosts, *D.*  
514 *canariensis* Bastin, Burckhardt & Ouvrard and *D. fruticosi* Bastin, Burckhardt & Ouvrard,  
515 together with strong support ( $\geq 99\%$ ), but as with the Psylloidea analysis this is the only strongly  
516 supported grouping within the genus. Only the NJ analysis groups together the two Madeiran  
517 taxa on *Pittosporum*, *D. fernandesi* (Aguiar) and *D. pittospori* (Aguiar), with moderately strong  
518 support (82%), and only this analysis recovers the two Solanaceae-feeding species together, *D.*  
519 *molinae* Bastin, Burckhardt & Ouvrard and *D. lienhardi* (Burckhardt), but with very weak  
520 support. Individual phylogenetic analyses (NJ, BI, ML) with support values are shown in  
521 Supporting Information Figs S1-S3.

522 *Percyella* has diversified on an endemic Canary Island *Convolvulus* (*C. floridus*) and the  
523 sister group relationship within Group A in the backbone analysis does not reflect any particular  
524 host associations other than that the hosts in this subgroup are primarily euasterids,

525 particularly in Asteraceae and Apiaceae. Within *Percyella*, all three cox1 analyses (NJ, BI, ML)  
526 group together with strong support the two more easterly island taxa: *Percyella canari* and *P.*  
527 *ganche*, from Gran Canaria and Tenerife respectively; but only the BI analysis also groups the  
528 two more westerly island taxa together (with strong support): *P. gomerita* and *P. benahorita*,  
529 from La Gomera and La Palma respectively (Fig. 2, Supporting Information Figs S1-S3). All three  
530 analyses show the striking geographic structure in *P. ganche* and *P. benahorita* with eastern  
531 and western clades within each island.

532

### 533 **Dating analyses and characterization of the *Percyella* island radiation on *Convolvulus floridus*** 534 **(Convolvulaceae)**

535 The two BI calibration analyses that used a single island calibration (either Kauai or La Palma)  
536 gave non credible ages older than the island age for one or more of the other noncalibrated  
537 island lineages. Using all three island calibrations within the Hawaiian Islands gave the most  
538 credible dated tree conforming to diversification events younger than the maximum age of the  
539 islands on which the diversification events occurred. The estimated ages of diversification for  
540 *Percyella* and *Drepanoza* clearly show that *Percyella* is a considerably younger group (Fig. 2).  
541 Further interpretation of the dates within *Drepanoza* is hindered by the lack of phylogenetic  
542 resolution, and only the date for the diversification of *D. canariensis* and *D. fruticosi* on  
543 *Convolvulus* in the Canary Islands is considered a notable result. In contrast, the dated analysis  
544 for *Percyella* is more revealing.

545 The age calibrated Bayesian analysis shows the two *Percyella* taxa on Tenerife and La  
546 Palma are older (0.7-0.82 Mya) than the taxa on La Gomera and Gran Canaria (0.12-0.19 Mya),  
547 and diversification of populations in the eastern and western clades on Tenerife and La Palma  
548 likely coincided with colonization of, and diversification on La Gomera and Gran Canaria (Fig. 2).  
549 Our dated interpretation of the *Percyella* diversification is consistent with divergence between  
550 the easterly island taxa (*P. canari*, *P. ganche*) and the western island taxa (*P. gomerita*, *P.*  
551 *benahorita*) at 2.47 Mya occurring during the Plio-Pleistocene transition. The initial  
552 diversification of the eastern group (1.8 Mya) and marginally younger western group (1.78 Mya)  
553 is estimated to have occurred during the early Pleistocene. Similar age estimates, but a little

554 younger, can be deduced for the initial diversification within the more westerly islands.  
555 Maximum *cox1* sequence divergence within each species is given in Table 3 and shows the  
556 notably higher divergence in *P. benahorita* (4.3%) and *P. guancho* (3.1%), than in *P. gomerita*  
557 (0.9%) and *P. canari* (0.6%).

558 Figure 3 shows the sampling sites and haplotype assignment for the four species on four  
559 islands. On two islands, Tenerife and La Palma, occurrence of some individuals (2-4) from a  
560 different island/species (indicated with asterisks in Fig. 2 and Fig. 3) suggests individuals may be  
561 transported between islands, and this is likely human mediated along with transport of the host  
562 plant for horticultural purposes. In these two instances of “non-local” occurrences, sampling  
563 locations were from planted sites (sites T4 and site P9, Figs 2-3), and the individuals have  
564 identical haplotypes to a native population from the originating island. The host, *Convolvulus*  
565 *floridus*, is native on all four islands but it is also planted as an ornamental along roadsides and  
566 in urban environments. However, we ~~can not~~ conclusively rule out natural dispersal between  
567 islands. Nevertheless, despite these occurrences, we consider the status of all *Percyella* species  
568 to be single island endemics with introductions on two islands.

569

570 **Figure 3. Haplotype median-joining network using 280 bp of *cox1* data shared by all 50**  
571 **samples from four species of *Percyella* sampled for this study.** Maps show sampling locations  
572 on the four islands. The geographic location and haplotype association of sample DP195 *P.*  
573 *benahorita* sampled for Percy et al. (2018) and represented in Fig. 1 is shown. Haplotype colour  
574 coding is the same as for individuals in Fig. 2.

575

576 The haplotype network and maps in Fig. 3 illustrate the same geographic structure as  
577 the calibrated Bayesian analysis (Fig. 2), but with the removal of sequence length variation  
578 provides a cleaner overview of haplotype structure. The median-joining network found 12  
579 unique haplotypes and 46 segregating sites in the 280 bp *cox1* fragment. Using geotags for each  
580 sample site and a centroid georeference for each island, 63% of variation was found within  
581 populations (excluding the four “non-local”/introduced individuals would have increased within  
582 population variation). To summarize, *Percyella canari* is considered native to Gran Canaria

583 (introduced to Tenerife) and is shown as the most homogeneous of the four species with only  
584 one haplotype despite sampling from three locations. Similarly, *P. guanche* is considered native  
585 to Tenerife (introduced to La Palma). The number of distinct haplotypes (three) is the same for  
586 *P. guanche* on Tenerife and *P. gomerita* from La Gomera, but *P. guanche* has one haplotype  
587 that is considerably more divergent from the other two and represents the eastern clade on  
588 Tenerife (also shown in Fig. 2) with four sampling locations in the northeastern Anaga Peninsula  
589 (T5-T8), the other haplotypes are located in the northwest of Tenerife (T1-T3). On La Palma, *P.*  
590 *benahorita*, with the largest number of haplotypes (five), shows distinct divergence between  
591 three haplotypes found in the eastern part of the island (sampling sites P1-P6), and the other  
592 two haplotypes found in the western part (sites P8, DP195), which reflects the eastern and  
593 western clades shown in Fig. 2. On La Gomera, divergence of haplotypes at site G4 is more  
594 apparent in the BI analysis (Fig. 2) and other analyses using the full sequence lengths  
595 (Supporting Information Figs S1-S3) than in the haplotype analysis.

596

## 597 **Discussion**

598

### 599 **Phylogenetic backbone analysis for placing taxa within the Psylloidea tree**

600 Although a maximum likelihood constraint tree method is not an optimal phylogenetic  
601 approach, it provides an effective best estimate solution to place taxa with limited sequence  
602 data when a reasonably well resolved backbone is available (Boyle & Adamowicz, 2015; Percy  
603 et al., 2018; Macías-Hernández et al., 2020). Short fragments of fast evolving mitochondrial  
604 regions rapidly become saturated and unreliable for resolving deeper phylogenetic events and  
605 can be insufficient alone for a reliable systematic hypothesis (Wilson, 2010). In addition, we  
606 acknowledge that placement of taxa for which no close relatives are present in the original  
607 backbone phylogeny, (e.g., for *Megadicrania*) can be problematic, and in these instances  
608 additional mitogenome data would be optimal. Despite these caveats, and partly due to  
609 sampling in the original mitogenome data containing most of the genera or close genera  
610 represented in the Macaronesian fauna, our systematic placement of most of the island taxa  
611 within the Psylloidea phylogeny are well resolved and supported, allowing interpretation of

612 systematic placement, colonization events, and host plant associations for the majority of  
613 species.

614

615 **Phylogenetic diversity in the central Macaronesian islands and patterns of island colonization**  
616 **and host association**

617 Overall, the taxonomic breadth represented in the native psyllid fauna of the central  
618 Macaronesian islands is high (Bastin et al., 2023; Aguiar et al., 2019). The large number of  
619 estimated colonization events (26) giving rise to the native fauna is perhaps not surprising given  
620 the islands' relative proximity to continental source areas resulting in a greater likelihood of  
621 colonization by multiple diverse lineages (Percy, 2010). Consistent with general patterns of  
622 colonization into the region (Juan et al., 2000; Sanmartín et al., 2008), most of the psyllid  
623 colonization events (69%) are represented by a single Macaronesian native species. At least five  
624 of the native genera are each represented by two to four independent colonizations events  
625 (*Agonoscena*, *Arytaina*, *Cacopsylla*, *Drepanoza*, and *Euphyllura*). Multiple colonizations within  
626 the same genus are found in other arthropod groups, examples include *Calathus* (Coleoptera)  
627 (Emerson et al., 2000), *Dysdera* (Arachnida) (Arnedo et al., 2001), and *Sphingonotus* (Orthoptera)  
628 (Husemann et al., 2014). In these cases, independent colonizations from congeneric species are  
629 mostly confined to different archipelagos or to different islands within an archipelago if they  
630 share ecologically similar niches. Niche preemption (i.e., incumbent advantage) also known as  
631 the priority effect (Fabre et al., 2014; De Meester et al., 2016), is one mechanism that may  
632 promote this distribution, whereby multiple colonizations of ecologically equivalents only  
633 establish in allopatry (Waters et al., 2013; Tan et al., 2017). Similar processes have been  
634 proposed for Macaronesian plant species (Carine et al., 2004). Among Macaronesian psyllids,  
635 only *Strophingia* is potentially consistent with this process, but interpretation is hindered by the  
636 need for further sampling of continental *Strophingia* taxa to establish one or multiple  
637 colonizations by this genus. *Drepanoza* has independent colonizations on different  
638 archipelagos, but these are not ecologically equivalent as taxa occur on different host plant  
639 families. The remaining four genera represented by multiple colonizations can be found on the  
640 same islands within the Canary Islands; and two of these (*Agonoscena* and *Cacopsylla*) are not

641 ecologically equivalent as the hosts are in different plant families; other genera with multiple  
642 colonizations (e.g., *Arytaina* and *Euphyllura*) can be found on related plants, but not the same  
643 host species. Interestingly, dated phylogenies for the host plants of *Cacopsylla* and *Euphyllura*  
644 indicate the origin of the host lineages in Macaronesia are asynchronous (Kondraskov et al.,  
645 2015; Martín-Hernanz et al., 2023) and therefore during different historical periods, priority  
646 effects may have been stronger and colonization history more relevant if both immigrants and  
647 incumbents favored similar niches (e.g., the same or closely related host plants) (Tan et al.,  
648 2017). In summary, priority effects are not evident in observed distributions but ~~can not be~~  
649 discounted. In contrast, independent colonizations by congeneric psyllids appears mostly  
650 facilitated by ecological non-equivalence (i.e., differences in progenitor host preferences).

651 As with other host specific insects in Macaronesia, island psyllid lineages have been  
652 shown to exhibit efficient sequential codiversification with rapid colonization of available and  
653 familiar plant lineages (Hernández-Teixidor et al., 2016; Percy et al., 2004). In all but a few  
654 cases, host plant associations of island taxa are readily predicted by hosts associations in  
655 continental relatives/progenitors. More than 60% of colonizations involved use of the same  
656 host plant species, or same host plant genus as continental relatives. Notably, the island-  
657 continent species pair in *Lauritrioza* and *Diaphorina* are hosted by sister plant species (Martín-  
658 Hernanz, 2023), suggesting a common route of dispersal for insect and host plant as well as  
659 possibly contemporaneous plant-insect diversification. The Macaronesian lineages on genistoid  
660 legumes (*Arytinnis*, *Arytaina*, *Arytainilla* and *Livilla*) are all examples of host switches to related  
661 legumes (Percy, 2003b) while the island-continent species pairs in *Euphyllura* and *Agonosцена*  
662 are likely examples of allopatric speciation without a host switch. Only two lineages involved  
663 colonization with a host switch to a different but related plant family (*Agonosцена sinuata* and  
664 *Percyella*), and only one colonization appears to have involved a host switch to an unrelated  
665 plant family (*Lisronia echidna*).

666

### 667 **Island distribution and extinction**

668 Within the Canary Islands, the majority of psyllids are on the five central and western islands  
669 (Gran Canaria, Tenerife, La Gomera, La Palma and El Hierro), and in particular, the two central

670 islands (Gran Canaria and Tenerife). Only a few psyllids have been recorded from the two drier,  
671 eastern islands (Lanzarote and Fuerteventura) and some native species records are considered  
672 unverified (Bastin et al., 2023). The five central and western Canary Islands, referred to as ‘high’  
673 islands due to higher elevations that support forested habitats are well known for species  
674 diversity, species radiations, and endemism in many plant and animal groups, including psyllids  
675 (Percy, 2003b; Cardoso et al., 2010; Triantis et al., 2010; Machado et al., 2017; Florencio et al.,  
676 2021; Pérez-Delgado et al., 2022). On the eastern islands, the low heterogeneity of habitats  
677 associated with the advanced eroded stage of these islands has been used to explain the low  
678 number of endemic species (Reyes-Betancort et al., 2008; Rodríguez et al., 2005). However,  
679 recent studies have suggested the islands’ historical ontogeny and climatic fluctuations during  
680 the Pleistocene better explain the low number of endemic species (Sanmartin et al., 2008;  
681 Caujapé-Castell et al., 2017; García Verdugo et al., 2019a). It is likely that some psyllid species  
682 and their hosts now found only in the western islands may once have occurred in these islands  
683 before the Pleistocene extinction (García-Verdugo et al., 2019a). For instance, colonization  
684 times for *Percyella* (2.5 Mya) as well as for *Arytinnis* (2.5 Mya) and the host genus *Teline* (2.9  
685 Mya) (Percy et al., 2004) predate the mid-Pleistocene transition (~0.8 Mya). Origins of the  
686 native psyllid lineages are almost entirely from proximal Mediterranean regions, southern  
687 Europe and north Africa which conforms with general patterns in the Macaronesian flora and  
688 fauna (Carine et al., 2004; Sanmartin et al., 2008). Only *Diaphorina gonzalezi* shows a  
689 remarkable disjunction with the closest relative found in South Asia. Interestingly, the  
690 Macaronesian host plant of *D. gonzalezi*, *Gymnosporia cassinoides*, is also disjunct from its  
691 closest relatives found in East Africa, Arabian Peninsula and South Asia (Martín-Hernanz et al.,  
692 2023), and therefore both plant and psyllid may be Tertiary relicts following on from climatic  
693 changes in the late Pliocene (Thompson, 2005; Vargas, 2007; Caujapé-Castells et al., 2022).

694         The Canary Islands has a greater taxonomic diversity and many more species than  
695 Madeira, which is not surprising given the larger number of islands and diversity of habitats. A  
696 similar pattern is found in many Macaronesian groups (Cardoso et al., 2010; Price et al., 2018).  
697 Notably, only two or three colonization events (*Arytinnis*, *Percyella*, and possibly *Strophingia*)  
698 resulted in in situ diversification of more than two or three species, and the majority of



699 colonization events, 18, resulted in no additional cladogenesis. No or limited species radiation  
700 may seem surprising given the varied diversity of islands and habitat types and the old age (21  
701 Mya) of the Canary Islands, particularly when compared with the Hawaiian Islands – a much  
702 younger archipelago (5 Mya) with a similar number of islands and habitat diversity. The  
703 Hawaiian archipelago has 74 native psyllid species in 11 genera resulting from as few as eight  
704 colonization events (Hembry et al., 2021). By comparison, the central Macaronesian islands  
705 have 58 native species in 17 genera resulting from 26 colonization events. However, this  
706 disparity between Macaronesian and Hawaiian archipelagos also conforms to patterns more  
707 generally: the Hawaiian Islands has an estimated ~940 endemic species from an estimated 169  
708 colonization events, and the Canary Islands has ~600 endemic species originating from ~230  
709 colonization events (García-Verdugo et al., 2019a; Price & Wagner, 2018). Despite similar  
710 temporal diversification periods for the origin of most of the extant biotas in both regions ( $\leq 5$   
711 Mya) (García-Verdugo et al., 2019b), the combination of greater geographic isolation and  
712 climatic buffering of the Hawaiian archipelago has likely resulted in the much greater in situ  
713 diversification coupled with reduced extinction (Gillespie et al., 2012; Shaw & Gillespie, 2016;  
714 García-Verdugo et al., 2019b; Hembry et al., 2021).

715         Dispersal limitation can be a driver of species richness (Ikeda et al., 2012; Suárez et al.,  
716 2022) and consequently, limited cladogenesis in Canary Island psyllid lineages may result from  
717 relatively more numerous colonization events. As well as continental proximity, favorable trade  
718 winds likely increase rates of transportation of small insects like psyllids (Hodkinson 1974, 2009;  
719 Gillespie et al., 2012). Multiple colonizations by psyllid lineages already preadapted to island  
720 plant lineages could rapidly occupy vacant ecological niches (e.g., familiar host plants), and in  
721 this way, colonizer packing fills ecological niches faster than is possible via in situ evolution.  
722 Conversely, many endemic Hawaiian species are considered to have emerged when evolution  
723 outpaced immigration as a source of novel diversity (Gillespie, 2016). To summarize, three  
724 factors advantage colonizing psyllids over de novo species in Macaronesia: a) proximity of the  
725 Macaronesian islands to immigrant sources, b) similarity of the floras in Macaronesia and  
726 source areas, and linked to a) and b), c) preadaptation of immigrants to the same or closely  
727 related host plants (Percy, 2003b, 2010; Percy et al., 2004). Limited diversity in Macaronesian

728 host plant lineages also determines the extent of diversity within island psyllid lineages, as  
729 psyllid radiations almost exclusively involve switching between closely related host plants  
730 (Percy, 2003b; Taylor et al., 2016; Ouvrard et al., 2015; Burckhardt & Basset, 2000). Among  
731 psyllid host plant genera in Macaronesia, only the genus *Teline*, hosting the psyllid radiation of  
732 *Arytinnis*, has undergone substantial in situ radiation (Percy & Cronk, 2002). Other host plant  
733 genera have undergone little or no further diversification in the region, for example, *Picconia*,  
734 *Olea*, *Erica*, *Chamaecytisus*, *Spartocytisus*, *Salix*, *Rhamnus*, and *Withania* are each represented  
735 by only one or two endemic species (see Supporting Information Table S3).

736

### 737 ***Convolvulus*-feeding and *Percyella* diversification**

738 Given the above argument, and as two *Convolvulus*-feeding psyllid genera are already present  
739 in the Canary Islands, there is no obvious explanation why several endemic island *Convolvulus*  
740 species, which are apparently vacant niches (see Supporting Information Table S2), have not  
741 been colonized by psyllids. One explanation is that Convolvulaceae is an uncommon host group  
742 for psyllids (<10 Convolvulaceae feeders worldwide) due to specific inhibitors preventing ready  
743 access to this plant family, even to the extent of inhibiting host switches from one *Convolvulus*  
744 species or clade to another. Apart from Canary Island psyllids on *Convolvulus*, the only other  
745 confirmed host records from this plant family are in *Bactericera* (Triozidae) and *Diaphorina*  
746 (Psyllidae) (Ouvrard, 2022). Yet, there have been two independent colonizations of *Convolvulus*  
747 in the Canary Islands (by *Drepanoza* and *Percyella*). Both from genera in family Triozidae which  
748 is dominant on euasterid host groups (Ouvrard et al., 2015), but in neither case are there  
749 known close relatives in geographical source areas that could explain Convolvulaceae as a host  
750 selection in island taxa. The closest taxa in the Psylloidea phylogeny are all on hosts in other  
751 euasterids: Apiales, Asterales, and Solanales.

752 The plant genus *Convolvulus* in the Canary Islands is composed of nine endemic species  
753 in two distinct clades that are from distantly related lineages with distinct morphologies, and  
754 these represent two independent colonizations from different regions of the Mediterranean  
755 (Carine et al., 2004). The first clade includes host plants of two *Convolvulus*-feeding psyllids in  
756 *Drepanoza* which each psyllid species occurring on a different host species (on *Convolvulus*

757 *fruticulosus* and *C. canariensis*). The second *Convolvulus* clade has three species and one of  
758 these, *C. floridus*, is host to the modest radiation of four psyllid species in *Percyella*. The  
759 relatively young age of *Percyella* compared to *Drepanoza* may also partly explain why  
760 diversification on other island *Convolvulus* or indeed other euasterid hosts has not occurred in  
761 *Percyella* but has, albeit with only a single host switch on *Convolvulus*, in the older genus  
762 *Drepanoza*.

763         The diversification of *Percyella* in the Canary Islands is a textbook example of allopatric  
764 speciation, with a single species on each of four islands, but with no apparent ecological niche  
765 specialization because all species are on the same host plant. Genetic divergence within  
766 *Percyella* species at first glance seems contrary to expectations. *Percyella canari* is the most  
767 homogeneous of the four species, followed by increasing haplotype diversity in *P. gomerita*, *P.*  
768 *ganche* and maximum haplotype diversity is found in *P. benahorita*. This pattern is counter to  
769 expectations based on island age, as *P. canari* occurs on the oldest of the four islands and *P.*  
770 *benahorita* on the youngest. However, the dated *Percyella* radiation implies the genus is  
771 relatively young and therefore the structure and extent of diversification within each species is  
772 less a product of maximum island age, but more likely influenced by recent periods of  
773 volcanism and individual island topology. This scenario would explain the greater genetic  
774 diversity evident in the more geographically structured and isolated populations on the more  
775 geologically dynamic islands of Tenerife and La Palma. Other studies of phytophagous insects  
776 on geologically volatile islands found similarly important roles for geography, for instance early  
777 diversification of Hawaiian planthoppers was explained by complex island topography rather  
778 than host niche specialization (Roesch Goodman et al., 2012), and dynamic volcanic  
779 environments were found to be important in structuring Hawaiian spider populations (Roderick  
780 et al., 2012).

781

## 782 **Conclusions**

783 We present the most comprehensive phylogenetic survey of the central Macaronesian psyllid  
784 fauna to date. We provide new molecular data for 42 of the native and introduced species as  
785 well as some of the continental outgroups. We present a phylogenetic framework for

786 understanding the origins and evolution of Macaronesian taxa, including characterization of the  
787 first psyllid radiation known on Convolvulaceae. Additionally, the molecular data provides a  
788 DNA barcode library for both native and introduced species on these islands that should prove  
789 a useful resource for evolutionary and applied research.

790

## 791 **Acknowledgements**

792 We thank Jon Martin, Antonio Aguiar, Arturo Baz, Ernst Heiss, Charles Lienhard, Bernhard Merz,  
793 Igor Malenovský, Daniel Burckhardt and P. Oromí for supplying specimens or making their  
794 collections of Central Macaronesian psyllids available for study. We are grateful to Heidi  
795 Viljanen (FMNH) for providing information on and access to the collection of Canary Islands  
796 psyllid species of the Finnish Museum of Natural History. We also thank Antonio González  
797 Hernández, Alfonso Peña Darias, Jonathan Molina Hernández and Ángel Francisco García  
798 Hernández for their generous assistance in collecting psyllid material in the Canary Islands and  
799 Francisco Manuel Fernandes, Isamberto Silva and Antonio Aguiar in Madeira. We are grateful to  
800 Jean-Claude Streito for providing molecular data of *Agonosceca* species. We thank Brent  
801 Emmerson and Heriberto López for providing lab training, and Quentin Cronk for providing  
802 laboratory facilities at University of British Columbia. We are grateful to Estrella Hernández  
803 Suárez for her support during the development of the project. Saskia Bastin is recipient of a  
804 2019-2023 PhD grant from the Agencia Canaria de Investigación Innovación y Sociedad de la  
805 Información (ACIISI), Consejería de Economía, Industria, Comercio y Conocimiento of the  
806 Gobierno de Canarias and the European Social Fund. This research was carried out with  
807 financial support from the research project CUARENTAGRI (MAC2/1.1a/231). We would also  
808 like to thank the Servicio de Sanidad Vegetal of the Dirección General de Agricultura del  
809 Gobierno de Canarias for allowing us the use of its equipment and facilities. For permits to  
810 collect, we thank the Viceconsejería de Medio Ambiente (Gobierno Autónomo de Canarias) and  
811 the Parque Nacional de Garajonay (La Gomera) (registro de entrada: 6.738, TELP/249).

812

## 813 **Author contributions**

814 SB, FSR and DMP conceived of the study; SB, ARB, and DMP conducted the fieldwork; SB and  
815 DMP conducted the lab work and analyses; all authors contributed to the writing of the  
816 manuscript.

817

### 818 **Data availability statement**

819 All sequences generated for this study are deposited in Genbank (Accessions: XXXXXXXX-  
820 XXXXXXXX, XXXXXXXX-XXXXXXX). Sequence alignment files are available from the corresponding  
821 author on request and are openly available from “figshare” at <http://doi.org/XXXXXX>. All other  
822 data is contained in this article.

823

### 824 **References**

825

826 Aguiar, A.M.F. & Martin, J.H. (1999) Psyllids (Homoptera: Psylloidea) from Madeira Island: An updated  
827 checklist including new records. *Boletim da Sociedade Portuguesa de Entomologia*, Supplement 6: 335–  
828 342.

829

830 Aguiar, A.F., Cravo, D., de Queiroz, D.L. & Burckhardt, D. (2019). The Jumping Plant-Lice of Madeira  
831 Archipelago and Selvagens Islands (Hemiptera: Psylloidea)—New Records, Updated Checklist and Notes  
832 on Some Natural Enemies. *Entomologist's Monthly Magazine*, 155: 113–126.

833

834 Arechavaleta, M., Rodríguez, S., Zurita, N. & García, A. (2010) Lista de especies silvestres de Canarias.  
835 Hongos, plantas y animales terrestres. Gobierno de Canarias, Santa Cruz de Tenerife, 579 pp.

836 Arnedo, M.A., Oromi, P. & Ribera, C. (2001) Radiation of the spider genus *Dysdera* (Araneae, Dysderidae)  
837 in the Canary Islands: cladistic assessment based on multiple data sets. *Cladistics* 17: 313–353.  
838 doi:10.1111/j.1096-0031.2001.tb00129.x

839

840 Bandelt, H., Forster, P. & Röhl, A. (1999) Median-joining networks for inferring intraspecific phylogenies.  
841 *Molecular Biology and Evolution*, 16:37–48. doi:10.1093/oxfordjournals.molbev.a026036

842

843 Bastin, S., Burckhardt, D., Reyes-Betancort, A., Hernández-Suárez, E. & Ouvrard, D. (2023) A review of  
844 the jumping plant-lice (Hemiptera: Psylloidea) of the Canary Islands, with descriptions of two new  
845 genera and sixteen new species. *Zootaxa*, 5313: 1–98. doi:10.11646/ZOOTAXA.5313.1.1

846

847 Bastin, S., Percy, D.M. & Siverio, F. (2023) Establishing reliable DNA barcoding primers for jumping plant  
848 lice (Psylloidea, Hemiptera). *BMC Research Notes*, (in press).

849

850 Beierkuhnlein, C., Walentowitz, A. & Welss, W. (2021). FloCan—A revised checklist for the flora of the  
851 Canary Islands. *Diversity*, 13: 480. doi:10.3390/d13100480

852

853 Bouckaert, R., Vaughan, T.G., Barido-Sottani, J., Duchêne, S., Fourment, M., Gavryushkina, A. et al.  
854 (2019) BEAST 2.5: An advanced software platform for Bayesian evolutionary analysis. *PLoS*  
855 *Computational Biology*, 15: e1006650. doi:10.1371/journal.pcbi.1006650

856  
857 Boyle, E.E. & Adamowicz, S.J. (2015) Community Phylogenetics: Assessing Tree Reconstruction Methods  
858 and the Utility of DNA Barcodes. *PLoS One*, 1: e0126662. doi:10.1371/journal.pone.0126662  
859  
860 Bruzzese, D. J., Wagner, D. L., Harrison, T., Jogesh, T., Overson, R. P., Wickett, N. J., Raguso, R.A. &  
861 Skogen, K. A. (2019). Phylogeny, host use, and diversification in the moth family Momphidae  
862 (Lepidoptera: Gelechioidea). *PLoS One*, 14: e0207833. doi:10.1371/journal.pone.0207833  
863  
864 Burckhardt, D. & Basset, Y. (2000) The jumping plant-lice (Hemiptera, Psylloidea) associated with *Schinus*  
865 (Anacardiaceae): Systematics, biogeography and host plant relationships. *Journal of Natural History* 34:  
866 57–155. doi:10.1080/002229300299688  
867  
868 Burckhardt, D. (2005) Biology, ecology, and evolution of gall-inducing psyllids (Hemiptera:  
869 Psylloidea). In: Raman, A., Schaefer, C.W., Withers, T.M. (eds) *Biology, Ecology, and Evolution of*  
870 *Gall-inducing Arthropods*, pp. 143–157. Plymouth: Science Publishers, Enfield.  
871  
872 Burckhardt, D., Ouvrard, D. & Percy, D.M. (2021) An updated classification of the jumping plant-lice  
873 (Hemiptera: Psylloidea) integrating molecular and morphological evidence. *European Journal of*  
874 *Taxonomy*, 736: 137–182. doi:10.5852/ejt.2021.736.1257  
875  
876 Caujapé-Castells, J., García-Verdugo, C., Marrero-Rodríguez, Á., Fernández-Palacios, J. M., Crawford, D. J.  
877 & Mort, M. E. (2017) Island ontogenies, syngameons, and the origins and evolution of genetic diversity  
878 in the Canarian endemic flora. *Perspectives in Plant Ecology. Evolution and Systematics*, 27: 9–22.  
879 doi:10.1016/j.ppees.2017.03.003  
880  
881 Caujapé-Castells, J., García-Verdugo, C., Sanmartín, I., Fuertes-Aguilar, J., Romeiras, M.M., Zurita-Pérez,  
882 N. et al. (2022) The late Pleistocene endemicity increase hypothesis and the origins of diversity in the  
883 Canary Islands Flora. *Journal of Biogeography*, 49: 1469–1480. doi:10.1111/jbi.14394  
884  
885 Cardoso, P., Arnedo, M.A., Triantis, K.A. & Borges, P.A.V. (2010) Drivers of diversity in Macaronesian  
886 spiders and the role of species extinctions. *Journal of Biogeography*, 37: 1034–1046. doi:10.1111/j.1365-  
887 2699.2009.02264.x  
888  
889 Carine, M.A., Russell, S.J., Santos-Guerra, A. & Francisco-Ortega, J. (2004) Relationships of the  
890 Macaronesian and Mediterranean floras: molecular evidence for multiple colonizations into  
891 Macaronesia and back-colonization of the continent in *Convolvulus* (Convolvulaceae). *American Journal*  
892 *of Botany*, 91: 1070–1085. doi:10.3732/ajb.91.7.1070  
893  
894 Carine, M.A. (2005) Spatio-temporal relationships of the Macaronesian endemic flora: a relictual series  
895 or window of opportunity? *Taxon*, 54: 895–903. doi:10.2307/25065476  
896  
897 Casquet, J., Thebaud, C. & Gillespie, R.G. (2012) Chelex without boiling, a rapid and easy technique to  
898 obtain stable amplifiable DNA from small amounts of ethanol-stored spiders. *Molecular Ecology*  
899 *Resources*, 1: 136–141. doi:10.1111/j.1755-0998.2011.03073.x  
900  
901 Davranoglou, L.R., Baňář, P., Malenovský, I., & Kment, P. (2022) A new species of *Collartida* Villiers from  
902 the Solomon Islands (Hemiptera: Reduviidae). *Austral Entomology*, 61: 448–461. doi:10.1111/aen.12621  
903

904 De Meester, L., Vanoverbeke, J., Kilsdonk, L.J. & Urban, M.C. (2016) Evolving perspectives on  
905 monopolization and priority effects. *Trends in Ecology & Evolution*, 31: 136–146.  
906 doi:10.1016/j.tree.2015.12.009  
907

908 Emerson, B.C., Oromí, P., & Hewitt, G.M. (2000) Interpreting colonization of the *Calathus* (Coleoptera:  
909 Carabidae) on the Canary Islands and Madeira through the application of the parametric bootstrap.  
910 *Evolution*, 54: 2081–2090. doi:10.1111/j.0014-3820.2000.tb01251.x  
911

912 Emerson, B.C. (2002) Evolution on oceanic islands: molecular phylogenetic approaches to understanding  
913 pattern and process. *Molecular Ecology*, 11: 951–966. doi:10.1046/j.1365-294x.2002.01507.x  
914

915 Emerson, B.C. (2008) Speciation on islands: what are we learning? *Biological Journal of the Linnean*  
916 *Society*, 95: 47–52. doi:10.1111/j.1095-8312.2008.01120.x  
917

918 Fabre, P. H., Moltensen, M., Fjeldså, J., Irestedt, M., Lessard, J.P. & Jønsson, K.A. (2014) Multiple waves  
919 of colonization by monarch flycatchers (*Myiagra*, Monarchidae) across the Indo-Pacific and their  
920 implications for coexistence and speciation. *Journal of Biogeography*, 41: 274–286.  
921 doi:10.1111/jbi.12202  
922

923 Fernández-Palacios, J.M. (2010) The islands of Macaronesia. In Serrano, A.R.M., Borges, P.A.V.,  
924 Boieiro, M., Oromí, P. (eds) *Terrestrial Arthropods of Macaronesia: Biodiversity, Ecology and*  
925 *Evolution*, pp. 1–30. Sociedade Portuguesa de Entomologia, Lisboa.

926 Fernández-Palacios, J. M., de Nascimento, L., Otto, R., Delgado, J. D., García-del-Rey, E., Arévalo, J. R.,  
927 & Whittaker, R. J. (2011) A reconstruction of Palaeo-Macaronesia, with particular reference to the  
928 long-term biogeography of the Atlantic island laurel forests. *Journal of Biogeography*, 38: 226–246.  
929 doi:10.1111/j.1365-2699.2010.02427.x

930 Florencio, M., Patiño, J., Nogué, S., Traveset, A., Borges, P.A., Schaefer, H. et al. (2021) Macaronesia as a  
931 fruitful arena for ecology, evolution, and conservation biology. *Frontiers in Ecology and Evolution*, 752.  
932 [doi:10.3389/fevo.2021.718169](https://doi.org/10.3389/fevo.2021.718169)  
933

934 Folmer, O., Black, M., Hoeh, W., Lutz, R. & Vrijenhoek, R. (1994) DNA primers for amplification of  
935 mitochondrial cytochrome c oxidase subunit I from diverse metazoan invertebrates. *Molecular Marine*  
936 *Biology and Biotechnology*, 3: 294–299.  
937

938 Forbes, A. A., Devine, S. N., Hippee, A. C., Tvedte, E. S., Ward, A. K., Widmayer, H. A., & Wilson, C. J.  
939 (2017) Revisiting the particular role of host shifts in initiating insect speciation. *Evolution*, 7: 1126–1137.  
940

941 García-Talavera, F. (1997) Las Canarias orientales y la vecina costa africana en el Holoceno. *Eres*, 7: 55–  
942 63.  
943

944 García-Talavera, F. (1999) La Macaronesia. Consideraciones geológicas, biogeográficas y  
945 palaeoecológicas. In Fernández-Palacios, J.M., Bacallado, J.J., Belmonte, J.A. (eds.) *Ecología y cultura en*  
946 *Canarias*, pp. 39–63. Museo de la Ciencia, Cabildo Insular de Tenerife, Santa Cruz de Tenerife, Canary  
947 Islands.  
948

949 García-Verdugo, C., Caujapé-Castells, J., Illera, J. C., Mairal, M., Patiño, J., Reyes-Betancort, A. et al.  
950 (2019a) Pleistocene extinctions as drivers of biogeographical patterns on the easternmost Canary  
951 Islands. *Journal of Biogeography*, 46: 845–859. doi:10.1111/jbi.13563  
952

953 García-Verdugo, C., Caujapé-Castells, J. & Sanmartín, I. (2019b) Colonization time on island settings:  
954 lessons from the Hawaiian and Canary Island floras. *Botanical Journal of the Linnean Society*, 191: 155–  
955 163. doi:10.1093/botlinnean/boz044  
956

957 Geldmacher, J., Hoernle, K., Bogaard, P.V.D., Duggen, S. & Werner, R. (2005) New <sup>40</sup>Ar/<sup>39</sup>Ar age and  
958 geochemical data from seamounts in the Canary and Madeira volcanic provinces: support for the mantle  
959 plume hypothesis. *Earth and Planetary Science Letters*, 237: 85–101. doi:10.1016/j.epsl.2005.04.037  
960

961 Gillespie, R.G. (2016) Island time and the interplay between ecology and evolution in species  
962 diversification. *Evolutionary Applications*, 9: 53–73. doi:10.1111/eva.12302  
963

964 Gillespie, R.G., Baldwin, B.G., Waters, J.M., Fraser, C.I., Nikula, R. & Roderick, G.K. (2012) Long-distance  
965 dispersal: A framework for hypothesis testing. *Trends in Ecology and Evolution*, 27: 47–56.  
966 doi:10.1016/j.tree.2011.08.009  
967

968 Gobierno de Canarias (2023) Banco de Datos de Biodiversidad de Canarias. Available from:  
969 [www.biodiversidadcanarias.es/biota](http://www.biodiversidadcanarias.es/biota) (accessed 20 July 2023)  
970

971 Hebert, P.D., Penton, E.H., Burns, J.M., Janzen, D.H. & Hallwachs, W. (2004) Ten species in one: DNA  
972 barcoding reveals cryptic species in the neotropical skipper butterfly *Astraptes fulgerator*. *Proceedings*  
973 *of the National Academy of Sciences, USA*, 101: 14812–14817. doi:10.1073/pnas.0406166101  
974

975 Hembry, D.H., Bennett, G., Bess, E., Cooper, I., Jordan, S., Liebherr, J. et al. (2021) Insect radiations on  
976 islands: biogeographic pattern and evolutionary process in Hawaiian insects. *The Quarterly Review of*  
977 *Biology*, 96: 247–296. doi:10.1086/717787  
978

979 Hernández-Teixidor, D., López, H., Pons, J., Juan, C. & Oromí, P. (2016) Host plant associations and  
980 geographical factors in the diversification of the Macaronesian *Rhopalomesites* beetles (Coleoptera:  
981 Curculionidae). *Journal of Biogeography*, 43: 1608–1619. doi:10.1111/jbi.12737  
982

983 Hodkinson, I.D. (1974) The biology of the Psylloidea (Homoptera): a review. *Bulletin Of Entomological*  
984 *Research*, 64: 325–338.  
985

986 Hodkinson, I.D. (1990) New species of psyllid from the Canary Islands and Madeira (Homoptera:  
987 Psylloidea). *Eos*, 66: 29–35.  
988

989 Hodkinson, I.D. (2009) Life cycle variation and adaptation in jumping plant lice (Insecta: Hemiptera:  
990 Psylloidea): a global synthesis. *Journal of Natural History*, 43: 65–179. doi:10.1080/00222930802354167  
991

992 Hollis D. (2004) Australian Psylloidea. Jumping plant lice and lerp insects. 216 pp. Australian Biological  
993 Resources Study, Canberra.  
994



995 Husemann, M., Deppermann, J. & Hochkirch, A. (2014) Multiple independent colonization of the Canary  
996 Islands by the winged grasshopper genus *Sphingonotus* Fieber, 1852. *Molecular Phylogenetics and*  
997 *Evolution*, 81: 174–181. doi:10.1016/j.ympev.2014.09.017  
998

999 Ikeda, H., Nishikawa, M. & Sota, T. (2012) Loss of flight promotes beetle diversification. *Nature*  
1000 *Communications*, 3: 647–648. doi:10.1038/ncomms1659  
1001

1002 Illera, J.C., Spurgin, L.G., Rodriguez-Exposito, E., Nogales, M., & Rando, J.C. (2016) What are we learning  
1003 about speciation and extinction from the Canary Islands? *Ardeola*, 63: 15–33.  
1004 doi:10.13157/arla.63.1.2016.rp1  
1005

1006 Janz, N., Nylin, S. & Wahlberg, N. (2006) Diversity begets diversity: Host expansions and the  
1007 diversification of plant-feeding insects. *BMC Evolutionary Biology*, 6: 4. [doi:10.1186/1471-2148-6-4](https://doi.org/10.1186/1471-2148-6-4)  
1008

1009 Jousselin, E., Cruaud, A., Genson, G., Chevenet, F., Footitt, R.G. & Cœur d’acier, A. (2013) Is ecological  
1010 speciation a major trend in aphids? Insights from a molecular phylogeny of the conifer-feeding genus  
1011 *Cinara*. *Frontiers in Zoology*, 10: 56. [doi:10.1186/1742-9994-10-56](https://doi.org/10.1186/1742-9994-10-56)  
1012

1013 Jousselin, E. & Elias M. (2019) Testing host-plant driven speciation in phytophagous insects: a  
1014 phylogenetic perspective. ArXiv: 1910.09510, Peer-reviewed and recommended by PCI Evolutionary  
1015 Biology. [doi:10.20944/preprints201902.0215.v1](https://doi.org/10.20944/preprints201902.0215.v1).  
1016

1017 Joy, J.B. & Crespi, B.J. (2007) Adaptive radiation of gall-inducing insects within a single host-plant  
1018 species. *Evolution*, 61: 784–795. [doi:10.1111/j.1558-5646.2007.00069.x](https://doi.org/10.1111/j.1558-5646.2007.00069.x)  
1019

1020 Juan, C., Emerson, B.C., Oromí, P. & Hewitt, G.M. (2000) Colonization and diversification: towards a  
1021 phylogeographic synthesis for the Canary Islands. *Trends in Ecology & Evolution*, 15: 104–109.  
1022 doi:10.1016/s0169-5347(99)01776-0  
1023

1024 Kemp, J.E. & Ellis, A.G. (2017) Significant Local-Scale Plant-Insect Species Richness Relationship  
1025 Independent of Abiotic Effects in the Temperate Cape Floristic Region Biodiversity Hotspot. *PLoS One*,  
1026 12: e0168033. doi:10.1371/journal.pone.0168033  
1027

1028 Kondraskov, P., Schütz, N., Schübler, C., de Sequeira, M.M., Guerra, A.S., Caujapé-Castells, J. et al. (2015)  
1029 Biogeography of Mediterranean hotspot biodiversity: Re-Evaluating the ‘Tertiary relict’ hypothesis of  
1030 Macaronesian laurel forests. *PLoS One*, 10: e0132091. doi:10.1371/journal.pone.0132091  
1031

1032 Kumar, S., Stecher, G. & Tamura, K. (2016) MEGA7: molecular evolutionary genetics analysis version 7.0  
1033 for bigger datasets. *Molecular Biology and Evolution*, 33: 1870–1874. doi:10.1093/molbev/msw054  
1034

1035 Leigh, J.W. & Bryant, D. (2015) PopART: Full-feature software for haplotype network construction.  
1036 *Methods in Ecology and Evolution*, 6: 1110–1116. doi:10.1111/2041-210X.12410  
1037

1038 Lin, Y.P., Cook, D.H., Gullan, P.J. & Cook, L.G. (2015) Does host-plant diversity explain species richness in  
1039 insects? A test using Coccidae (Hemiptera). *Ecological Entomology*, 40: 299–306.  
1040 doi:10.1111/een.12191  
1041

1042 Loginova, M.M. (1976) Psyllids (Psylloidea, Homoptera) of the Canary Islands and Madeira.  
 1043 *Commentationes Biologicae*, 81: 1–37.  
 1044

1045 Macías-Hernández, N., Domènech, M., Cardoso, P., Emerson, B.C., Borges, P.A.V., Lozano-Fernandez, J.  
 1046 et al. (2020) Building a robust, densely-sampled spider tree of life for ecosystem research. *Diversity*, 12:  
 1047 288. doi:10.3390/d12080288  
 1048

1049 Machado, A., Rodríguez-Expósito, E., López, M. & Hernández, M. (2017) Phylogenetic analysis of the  
 1050 genus *Laparocerus*, with comments on colonisation and diversification in Macaronesia (Coleoptera,  
 1051 Curculionidae, Entiminae). *ZooKeys*, 651: 1–77. doi:10.3897/zookeys.651.10097  
 1052

1053 MacArthur, R.H. & Wilson, E.O. (2001) *The theory of island biogeography* (Vol. 1). Princeton University  
 1054 Press, Princeton, N.J.  
 1055

1056 Martín-Hernanz, S., Nogales, M., Valente, L., Fernández-Mazuecos, M., Pomedá-Gutiérrez, F., Cano, E. et  
 1057 al. (2023) Time-calibrated phylogenies reveal mediterranean and pre-mediterranean origin of the  
 1058 thermophilous vegetation of the Canary Islands. *Annals of Botany*, 131: 667–684.  
 1059 doi:10.1093/aob/mcac160  
 1060

1061 Miller, M.A., Pfeiffer, W. & Schwartz, T. (2010) Creating the CIPRES Science Gateway for inference of  
 1062 large phylogenetic trees. Proceedings of the Gateway Computing Environments Workshop (GCE), New  
 1063 Orleans, pp. 1–8.  
 1064

1065 Negredo, A.M., van Hunen, J., Rodríguez-González, J. & Fullea, J. (2022) On the origin of the Canary  
 1066 Islands: Insights from mantle convection modelling. *Earth and Planetary Science Letters*, 584: 117506.  
 1067 doi:10.1016/j.epsl.2022.117506  
 1068

1069 Neiber, M.T., Chueca, L.J., Caro, A., Teixeira, D., Schlegel, K.A., Gómez-Moliner, B.J. et al. (2021)  
 1070 Incorporating palaeogeography into ancestral area estimation can explain the disjunct distribution of  
 1071 land snails in Macaronesia and the Balearic Islands (Helicidae: Allognathini). *Molecular Phylogenetics  
 1072 and Evolution*, 162: 107196. doi:10.1016/j.ympev.2021.107196  
 1073

1074 Nyman, T., Vikberg, V., Smith, D.R. & Boevé, J.-L. (2010) How common is ecological speciation in plant-  
 1075 feeding insects? A 'Higher' Nematinae perspective. *BMC Evolutionary Biology*, 10: 266.  
 1076 doi:10.1186/1471-2148-10-266  
 1077

1078 Ouvrard, D., Chalise, P. & Percy, D.M. (2015) Host-plant leaps versus host-plant shuffle: a global survey  
 1079 reveals contrasting patterns in an oligophagous insect group (Hemiptera, Psylloidea). *Systematics and  
 1080 Biodiversity* 13: 434–454. doi:10.1080/14772000.2015.1046969  
 1081

1082 Ouvrard, D. (2022) Psyllist: The World Psylloidea Database [WWW document]. URL  
 1083 <http://www.hemiptera-databases.com/psyllist/> [accessed on 20 December 2022].  
 1084

1085 Park, D.S., Suh, S.J., Oh, H.W. & Hebert, P.D. (2010) Recovery of the mitochondrial COI barcode region in  
 1086 diverse Hexapoda through tRNA-based primers. *BMC Genomics*, 11: 423. doi:10.1186/1471-2164-11-423  
 1087

1088 Percy, D.M. (2003a) Legume-feeding psyllids (Hemiptera, Psylloidea) of the Canary Islands and Madeira.  
 1089 *Journal of Natural History*, 37: 397–461. doi:10.1080/713834706

1090  
1091 Percy, D.M. (2003b) Radiation, diversity and host plant interactions among island and continental  
1092 legume-feeding psyllids. *Evolution*, 57: 2540–2556. doi:10.1111/j.0014-3820.2003.tb01498.x  
1093  
1094 Percy, D. M. (2010) Insect-plant interactions on islands: Codiversification of legume-feeding psyllids  
1095 (Psylloidea) and their Fabaceae hosts. In Serrano, A.R.M., Borges, P.A.V., Boieiro, M., Oromí, P. (eds)  
1096 Terrestrial Arthropods of Macaronesia: Biodiversity, Ecology, and Evolution, pp. 285–307. Sociedade  
1097 Portuguesa de Entomologia, Lisboa.  
1098  
1099 Percy, D.M. (2017) Making the most of your host: the *Metrosideros*-feeding psyllids (Hemiptera,  
1100 Psylloidea) of the Hawaiian Islands. *ZooKeys*, 649: 1–163.  
1101  
1102 Percy, D.M. & Cronk, Q.C.B. (2002) Different fates of island brooms: Contrasting evolution in  
1103 *Adenocarpus*, *Genista* and *Teline* (Genisteae, Leguminosae) in the Canary Islands and Madeira. *American*  
1104 *Journal of Botany*, 89: 854–864. doi:10.3732/ajb.89.5.854  
1105  
1106 Percy, D.M., Page, R.D.M. & Cronk, Q.C.B. (2004) Plant-insect interactions: double-dating associated  
1107 insect and plant lineages reveals asynchronous radiations. *Systematic Biology*, 53: 120–127.  
1108 doi:10.1080/10635150490264996  
1109  
1110 Percy, D.M. (2018) Revision of the Hawaiian psyllid genus *Swezeyana*, with descriptions of seven new  
1111 species (Hemiptera, Psylloidea, Triozidae). *ZooKeys*, 758: 75–113. doi:10.3897/zookeys.758.23019  
1112  
1113 Percy, D.M., Crampton-Platt, A., Sveinsson, S., Lemmon, A.R., Lemmon, E.M., Ouvrard, D. & Burckhardt,  
1114 D. (2018) Resolving the psyllid tree of life: phylogenomic analyses of the superfamily Psylloidea  
1115 (Hemiptera). *Systematic Entomology*, 43: 762–776. doi:10.1111/syen.12302  
1116  
1117 Percy, D.M. & Cronk, Q.C. (2022) Psyllid honeydew as a *Bombus* food source in the boreal  
1118 landscape. *Ecological Entomology*, 47: 713–718. doi:10.1111/een.13147  
1119  
1120 Pérez-Delgado, A.J., Arribas, P., Hernando, C., López, H., Arjona, Y., Suárez-Ramos, D., Emerson, B.  
1121 C., Andújar, C. (2022) Hidden island endemic species and their implications for cryptic speciation within  
1122 soil arthropods. *Journal of Biogeography*, 49, 1367–1380. doi: 10.1111/jbi.14388  
1123  
1124 Price, J.P., Otto, R., Menezes de Sequeira, M., Kueffer, C., Schaefer, H., Caujapé-Castells, J., & Fernández-  
1125 Palacios, J.M. (2018) Colonization and diversification shape species–area relationships in three  
1126 Macaronesian archipelagos. *Journal of Biogeography*, 45: 2027–2039. doi:10.1111/jbi.13396  
1127  
1128 Price, J.P. & Wagner, W.L. (2018) Origins of the Hawaiian flora: Phylogenies and biogeography reveal  
1129 patterns of long-distance dispersal. *Journal of Systematics and Evolution*, 56: 600–620.  
1130 doi:10.1111/jse.12465  
1131  
1132 Rambaut, A. (2018) FigTree v1.4.4 available from URL: <http://tree.bio.ed.ac.uk/software/figtree/>  
1133  
1134 Rambaut, A., Drummond, A.J., Xie, D., Baele, G. & Suchard, M.A. (2018) Posterior summarisation in  
1135 Bayesian phylogenetics using Tracer 1.7. *Systematic Biology*, 67: 901–904. doi:10.1093/sysbio/syy032  
1136

- 1137 Reyes-Betancort, J.A., Santos-Guerra, A., Guma, I.R., Humphries, C.J. & Carine, M.A. (2008) Diversity,  
1138 rarity and the evolution and conservation of the Canary Islands endemic flora. *Anales del Jardín Botánico*  
1139 *de Madrid*, 65: 25–45. doi:10.3989/ajbm.2008.v65.i1.244  
1140
- 1141 Richards, L.A., Dyer, L.A., Forister, M.L. & Jeffrey, C.S. (2015) Phytochemical diversity drives plant–insect  
1142 community diversity. *Proceedings of the National Academy of Sciences*,  
1143 *USA*, 112: 10973–10978. doi:10.1073/pnas.1504977112  
1144
- 1145 Roesch Goodman, K., Welter, S.C. & Roderick, G.K. (2012) Genetic divergence is decoupled from  
1146 ecological diversification in the Hawaiian *Neosydne* planthoppers. *Evolution*, 66: 2798–2814.  
1147 doi:10.1111/j.1558-5646.2012.01643.x  
1148
- 1149 Roderick, G.K., Croucher, P.J.P., Vandergast, A.G. & Gillespie R.G. (2012) Species differentiation on a  
1150 dynamic landscape: Shifts in metapopulation genetic structure using the chronology of the Hawaiian  
1151 archipelago. *Evolutionary Biology* 39: 192–206. doi:10.1007/s11692-012-9184-5  
1152
- 1153 Rodríguez, A.R., Mora, J.L., Arbelo, C. & Bordon, J. (2005) Plant succession and soil degradation in  
1154 desertified areas (Fuerteventura, Canary Islands, Spain). *Catena*, 59: 117–131.  
1155 doi:10.1016/j.catena.2004.07.002  
1156
- 1157 Sanmartín, I., van der Mark, P. & Ronquist, F. (2008) Inferring dispersal: a Bayesian approach to  
1158 phylogeny-based island biogeography, with special reference to the Canary Islands. *Journal of*  
1159 *Biogeography*, 35: 428–449. doi:10.1111/j.1365-2699.2008.01885.x  
1160
- 1161 Sharma, P.P., Prieto, C.E. & Giribet, G. (2011) A new family of Laniatores (Arachnida: Opiliones) from the  
1162 Afrotropics. *Invertebrate Systematics*, 25: 143–154. doi:10.1071/IS11003
- 1163 Shaw, K.L. & Gillespie, R.G. (2016) Comparative phylogeography of oceanic archipelagos: Hotspots  
1164 for inferences of evolutionary process. *Proceedings of the National Academy of Sciences*,  
1165 *USA* 113: 7986–7993. doi:10.1073/pnas.1601078113  
1166
- 1167 Simon, C., Frati, F., Beckenbach, A., Crespi, B., Liu, H. & Flook, P. (1994) Evolution, weighting, and  
1168 phylogenetic utility of mitochondrial gene sequences and a compilation of conserved polymerase chain  
1169 reaction primers. *Annals of the Entomological Society of America*, 87: 651–701.  
1170 doi:10.1093/aesa/87.6.651  
1171
- 1172 Stamatakis, A. 2014. RAxML Version 8: A tool for phylogenetic analysis and post-analysis of large  
1173 phylogenies. *Bioinformatics*, 30: 1312–1313. doi:10.1093/bioinformatics/btu033  
1174
- 1175 Suárez, D., Arribas, P., Jiménez-García, E., & Emerson, B. C. (2022). Dispersal ability and its consequences  
1176 for population genetic differentiation and diversification. *Proceedings of the Royal Society B*, 289:  
1177 20220489. doi:10.1098/rspb.2022.0489  
1178
- 1179 Swofford, D.L. 2003. PAUP\*: phylogenetic analysis using parsimony (\*and other methods), version  
1180 4. Sinauer, Sunderland. URL: <https://paup.phylosolutions.com>
- 1181 Tan, J., Yang, X. & Jiang, L. (2017) Species ecological similarity modulates the importance of colonization  
1182 history for adaptive radiation. *Evolution*, 71: 1719–1727. doi:10.1111/evo.13249

- 1183 Taylor, G.S., Fagan-Jeffries, E.P. & Austin, A. D. (2016) A new genus and twenty new species of Australian  
1184 jumping plant-lice (Psylloidea: Triozidae) from *Eremophila* and *Myoporum* (Scrophulariaceae:  
1185 Myoporeae). *Zootaxa*, 4073: 1–84. doi:10.11646/zootaxa.4073.1.1
- 1186 Thompson, J.D., Higgins, D.G. & Gibson, T.J. (1994) “CLUSTAL W: improving the sensitivity of progressive  
1187 multiple sequence alignment through sequence weighting, position-specific gap penalties and weight  
1188 matrix choice.” *Nucleic Acids Research* 22: 4673–4680. doi:10.1093/nar/22.22.4673
- 1189 Thompson, J.D. (2005) *Plant Evolution in the Mediterranean*. Oxford: Oxford University Press.  
1190 doi:10.1093/acprof:oso/9780198515340.001.0001
- 1191 Triantis, K.A., Borges, P.A.V., Hortal, J. & Whittaker, R.J. (2010) The Macaronesian province: patterns of  
1192 species richness and endemism of arthropods. In Serrano, A.R.M., Borges, P.A.V., Boieiro, M., Oromí, P.  
1193 (eds.), *Terrestrial Arthropods of Macaronesia: Biodiversity, Ecology, and Evolution*, pp. 49-71. Lisboa:  
1194 Sociedade Portuguesa de Entomologia.
- 1195 Vargas, P. (2007) Are Macaronesian islands refugia of relict plant lineages?: a molecular survey. In:  
1196 Weiss, S., Ferrand, N. (eds) *Phylogeography of Southern European Refugia: Evolutionary perspectives on*  
1197 *the origins and conservation of European biodiversity*, pp. 297–314. Springer, Dordrecht. doi:10.1007/1-  
1198 4020-4904-8\_11
- 1199 van den Bogaard, P. (2013). The origin of the Canary Island Seamount Province-New ages of old  
1200 seamounts. *Scientific Reports*, 3: 2107. doi:10.1038/srep02107
- 1201 Waters, J.M., Fraser, C.I. & Hewitt, G.M. (2013) Founder takes all: Density-dependent processes  
1202 structure biodiversity. *Trends in Ecology and Evolution*, 28: 78–85. doi:10.1016/j.tree.2012.08.024
- 1203 Wilson, J.J. (2010) Assessing the value of DNA barcodes and other priority gene regions for molecular  
1204 phylogenetics of Lepidoptera. *PLoS One* 5: e10525. doi:10.1371/journal.pone.0010525
- 1205 Whittaker, R.J. & Fernández-Palacios, J.M. (2007) *Island Biogeography: Ecology, evolution, and*  
1206 *conservation*, 2nd Ed. Oxford University Press, Oxford.
- 1207 World Flora Online [WWW document]. URL <http://www.worldfloraonline.org/> [accessed on 11 August  
1208 2023].  
1209  
1210

1211 **Table and Figure Legends**

1212 **Tables**

1213 **Table 1. Summary of the distribution, host plants and molecular data for native psyllid taxa**  
1214 **(endemic species indicated by \*) of the central Macaronesian islands.** Abbreviations: CA:

1215 Canary Islands, MA: Madeira; H: El Hierro, P: La Palma, G: La Gomera, T: Tenerife, C: Gran  
1216 Canaria, F: Fuerteventura, L: Lanzarote; [?] indicates island distribution needs confirmation.  
1217 Molecular data generated during this study: cox1: cytochrome oxidase 1, cytb: cytochrome B;  
1218 mtg: data from Percy et al. (2018). Host plants given are records from Macaronesia if known.

1219

1220 **Table 2. Summary of the distribution, host plants and molecular data for the non-native**  
1221 **psyllid taxa of the central Macaronesian islands.** Abbreviations: CA: Canary Islands, MA:  
1222 Madeira; H: El Hierro, P: La Palma, G: La Gomera, T: Tenerife, C: Gran Canaria, F: Fuerteventura,  
1223 L: Lanzarote. Molecular data: cox1: cytochrome oxidase 1, cytb: cytochrome B, mtg: obtained  
1224 from Percy et al. (2018). Host plant records in Macaronesia (all records from Canary Islands) are  
1225 given if known.

1226

1227 **Table 3. Summary of the specimens of four *Percyella* species used in the phylogenetic and**  
1228 **haplotype analyses.** Abbreviations: % max div.: maximum intraspecific cox1 divergence  
1229 (uncorrected p-distances). Island: Is. P: La Palma, G: La Gomera, T: Tenerife, C: Gran Canaria.  
1230 Sites are shown in Figs. 2, 3. Variation in sequence length obtained for all *Percyella* specimens is  
1231 shown in Supporting Information (Figs S1-S3).

1232

1233 **Table 4. Primer combinations used to amplify cox1 with reference, sequence, annealing**  
1234 **temperature, and amplicon length.** Abbreviation: Tm: primer melting temperature.

1235

1236 **Figures**

1237 **Figure 1. Maximum likelihood analysis of the superfamily Psylloidea using the mitogenome**  
1238 **data published in Percy et al. (2018) as a backbone tree constraint and additional sequences**  
1239 **from this study added (see text, Tables 1-3).** The estimated number of independent

1240 colonizations/introductions for native and introduced taxa in the central Macaronesian islands  
1241 are indicated by square/triangle symbols. For systematic placement, names in bold indicate  
1242 sequence data was used in our analysis, and non-bold indicates no sequence data available so  
1243 placement inferred by congeneric taxa; phylogenetically closest taxon in [ ] for well supported,  
1244 or [?] if support is less than 80% bootstrap. Insets show taxon placement for native  
1245 Macaronesian taxa (box colour indicates psyllid family); taxon names in bold indicate short  
1246 sequences placed in the mitogenome backbone phylogeny.

1247

1248 **Figure 2. Bayesian inference dating analysis using *cox1* data for *Percyella* and *Drepanoza* with**  
1249 **age priors on three nodes (red node bars) in the Hawaiian *Pariaconus* radiation in order to**  
1250 **date the Macaronesian *Percyella* and *Drepanoza* genera (see text).** Node bars indicate 95%  
1251 HPD with mean age given in bold above nodes. Support values: BI/ML are given below nodes  
1252 (individual BI and ML trees are provide in Supporting Information Figs S2 and S3). Vertical bars  
1253 for *Percyella* species use the same colour scheme as mapped in Fig. 3; asterisks indicate  
1254 individuals interpreted as transported between islands. Three instances of identical sequence in  
1255 *Percyella* were not included in the analysis but individual sample codes indicate their  
1256 placement. *Drepanoza* consists of species endemic to Madeira (dark grey boxes), Canary Islands  
1257 (light grey box), and one continental species (*D. lienhardi*).

1258

1259 **Figure 3. Haplotype median-joining network using 280 bp of *cox1* data shared by all 50**  
1260 **samples from four species of *Percyella* sampled for this study.** Maps show sampling locations  
1261 on the four islands. The geographic location and haplotype association of sample DP195 *P.*  
1262 *benahorita* sampled for Percy et al. (2018) and represented in Fig. 1 is shown. Haplotype colour  
1263 coding is the same as for individuals in Fig. 2.

1264

**Table 1. Summary of the distribution, host plants and molecular data for native psyllid taxa (endemic species indicated by \*) of the central Macaronesian islands.** Abbreviations: CA: Canary Islands, MA: Madeira; H: El Hierro, P: La Palma, G: La Gomera, T: Tenerife, C: Gran Canaria, F: Fuerteventura, L: Lanzarote; [?] indicates island distribution needs confirmation. Molecular data generated during this study: cox1: cytochrome oxidase 1, cytb: cytochrome B; mtg: data from Percy et al. (2018). Host plants given are records from Macaronesia if known.

| Species                                                             | Distribution              | CA island | Recorded host plants in Macaronesia               | Host plant family | Molecular data  |
|---------------------------------------------------------------------|---------------------------|-----------|---------------------------------------------------|-------------------|-----------------|
| <b>Family: Aphalaridae</b>                                          |                           |           |                                                   |                   |                 |
| <i>Agonoscena atlantica</i> Bastin, Burckhardt & Ouvrard, 2023 *    | CA                        | T         | <i>Pistacia atlantica</i>                         | Anacardiaceae     | cox1, cytb      |
| <i>Agonoscena cisti</i> (Puton, 1882)                               | Western Palaearctic       | C         | No information                                    | No information    | cox1, cytb      |
| <i>Agonoscena sinuata</i> Bastin, Burckhardt & Ouvrard, 2023 *      | CA                        | T         | <i>Ruta pinnata</i>                               | Rutaceae          | cox1, cytb      |
| <i>Agonoscena targionii</i> (Lichtenstein, 1874)                    | Western Palaearctic       | C         | <i>Pistacia lentiscus</i>                         | Anacardiaceae     | cox1, cytb      |
| <i>Colposcena viridis</i> Loginova, 1972                            | Western Mediterranean, CA | C,F,L     | Unknown                                           | Unknown           | –               |
| <i>Lisronia echidna</i> Loginova, 1976 *                            | CA                        | T,C       | <i>Cistus monspeliensis</i>                       | Cistaceae         | cox1, cytb      |
| <i>Rhodochlanis salsolae</i> (Lethierry, 1874)                      | Western Mediterranean, MA |           | <i>Suaeda vera</i>                                | Chenopodiaceae    | –               |
| <b>Family: Liviidae</b>                                             |                           |           |                                                   |                   |                 |
| <i>Euphyllura canariensis</i> Loginova, 1973 *                      | CA, MA                    | P,T,C     | <i>Picconia excelsa</i>                           | Oleaceae          | cox1, cytb, mtg |
| <i>Euphyllura confusa</i> Bastin, Burckhardt & Ouvrard, 2023 *      | CA                        | T         | <i>Olea europaea</i>                              | Oleaceae          | cox1, cytb      |
| <i>Euphyllura olivina</i> (Costa, 1839)                             | Mediterranean, CA, MA     | C         | <i>Olea europaea</i>                              | Oleaceae          | cox1            |
| <i>Megadicrania tectipes</i> Loginova, 1976 *                       | CA                        | T,C       | <i>Olea cerasiformis</i> , <i>Olea europaea</i>   | Oleaceae          | cox1, cytb      |
| <i>Strophingia arborea</i> Loginova, 1976 *                         | MA                        |           | <i>Erica platycodon</i> spp.<br><i>madericola</i> | Ericaceae         | cox1, cytb, mtg |
| <i>Strophingia canariensis</i> Bastin, Burckhardt & Ouvrard, 2023 * | CA                        | T         | <i>Erica platycodon</i> spp.<br><i>platycodon</i> | Ericaceae         | cox1, cytb      |



|                                                                   |    |            |                                                                                                                                                      |           |            |
|-------------------------------------------------------------------|----|------------|------------------------------------------------------------------------------------------------------------------------------------------------------|-----------|------------|
| <i>Strophingia fallax</i> Loginova, 1976 *                        | MA |            | <i>Erica arborea</i>                                                                                                                                 | Ericaceae | cox1, cytb |
| <i>Strophingia paligera</i> Bastin, Burckhardt & Ouvrard, 2023 *  | CA | P,G,T      | <i>Erica canariensis</i>                                                                                                                             | Ericaceae | cox1, cytb |
| <b>Family: Psyllidae</b>                                          |    |            |                                                                                                                                                      |           |            |
| <i>Arytaina devia</i> Loginova, 1976 *                            | CA | G,T,F[?]   | <i>Chamaecytisus proliferus</i><br>ssp. <i>angustifolius</i> ,<br><i>Chamaecytisus proliferus</i><br>ssp. <i>proliferus</i> var.<br><i>palmensis</i> | Fabaceae  | cox1, cytb |
| <i>Arytaina meridionalis</i> Bastin, Burckhardt & Ouvrard, 2023 * | CA | C          | <i>Chamaecytisus proliferus</i><br>ssp. <i>meridionalis</i>                                                                                          | Fabaceae  | cox1, cytb |
| <i>Arytaina insularis</i> Loginova, 1976 *                        | CA | P          | <i>Chamaecytisus proliferus</i><br>ssp. <i>proliferus</i> var.<br><i>palmensis</i>                                                                   | Fabaceae  | cox1, cytb |
| <i>Arytaina nubivaga</i> Loginova, 1976 *                         | CA | T          | <i>Spartocytisus supranubius</i>                                                                                                                     | Fabaceae  | cox1, cytb |
| <i>Arytaina vittata</i> Percy, 2003 *                             | CA | H,P,G      | <i>Spartocytisus filipes</i> ,<br><i>Spartocytisus supranubius</i>                                                                                   | Fabaceae  | cox1, cytb |
| <i>Arytainilla serpentina</i> Percy, 2003 *                       | CA | P          | <i>Spartocytisus filipes</i>                                                                                                                         | Fabaceae  | mtg        |
| <i>Arytinnis canariensis</i> Percy, 2003 *                        | CA | T          | <i>Teline canariensis</i>                                                                                                                            | Fabaceae  | –          |
| <i>Arytinnis diluta</i> (Loginova, 1976) *                        | CA | T,C        | <i>Teline canariensis</i> , <i>Teline</i><br><i>microphylla</i>                                                                                      | Fabaceae  | –          |
| <i>Arytinnis dividens</i> (Loginova, 1976) *                      | CA | P[?],G,T,C | <i>Chamaecytisus proliferus</i>                                                                                                                      | Fabaceae  | mtg, cytb  |
| <i>Arytinnis equitans</i> (Loginova, 1976) *                      | CA | T,C        | <i>Teline canariensis</i> , <i>Teline</i><br><i>microphylla</i>                                                                                      | Fabaceae  | mtg        |
| <i>Arytinnis fortunata</i> Percy, 2003 *                          | CA | P          | <i>Teline splendens</i>                                                                                                                              | Fabaceae  | –          |
| <i>Arytinnis gomerae</i> Percy, 2003 *                            | CA | G          | <i>Teline stenopetala</i> ssp.<br><i>microphylla</i> , <i>Teline</i><br><i>stenopetala</i> ssp.<br><i>pauciovulata</i>                               | Fabaceae  | –          |
| <i>Arytinnis hupalupa</i> Percy, 2003 *                           | CA | G          |                                                                                                                                                      | Fabaceae  | –          |

|                                                                   |        |               |                                                                                                                                                       |            |            |
|-------------------------------------------------------------------|--------|---------------|-------------------------------------------------------------------------------------------------------------------------------------------------------|------------|------------|
|                                                                   |        |               | <i>Teline stenopetala</i> ssp. <i>microphylla</i> , <i>Teline stenopetala</i> ssp. <i>pauciovulata</i>                                                |            |            |
| <i>Arytinna incubata</i> (Loginova, 1976) *                       | MA     |               | <i>Teline maderensis</i>                                                                                                                              | Fabaceae   | –          |
| <i>Arytinna menceyana</i> Percy, 2003 *                           | CA     | T             | <i>Teline canariensis</i> , <i>Teline stenopetala</i> ssp. <i>spachiana</i>                                                                           | Fabaceae   | –          |
| <i>Arytinna modica</i> (Loginova, 1976) *                         | CA     | H,P           | <i>Chamaecytisus proliferus</i> , <i>Teline stenopetala</i> ssp. <i>microphylla</i>                                                                   | Fabaceae   | –          |
| <i>Arytinna nigrilineata</i> (Loginova, 1976) *                   | CA     | G,T,C         | <i>Adenocarpus foliolosus</i>                                                                                                                         | Fabaceae   | cox1       |
| <i>Arytinna occidentalis</i> Percy, 2003 *                        | CA     | H,P           | <i>Teline stenopetala</i> ssp. <i>microphylla</i> , <i>Teline stenopetala</i> ssp. <i>sericea</i> , <i>Teline stenopetala</i> ssp. <i>stenopetala</i> | Fabaceae   | –          |
| <i>Arytinna ochrita</i> Percy, 2003 *                             | CA     | T             | <i>Teline osyroides</i> ssp. <i>osyroides</i>                                                                                                         | Fabaceae   | –          |
| <i>Arytinna pileolata</i> (Loginova, 1976) *                      | CA     | T             | <i>Teline canariensis</i> , <i>T. osyroides</i> ssp. <i>sericea</i> , <i>T. stenopetala</i> ssp. <i>spachiana</i>                                     | Fabaceae   | –          |
| <i>Arytinna proboscidea</i> (Loginova, 1976) *                    | CA     | P,G,T, C,F[?] | <i>Adenocarpus foliolosus</i> , <i>Adenocarpus viscosus</i>                                                                                           | Fabaceae   | mtg        |
| <i>Arytinna prognata</i> (Loginova, 1976) *                       | CA     | C             | <i>Teline microphylla</i>                                                                                                                             | Fabaceae   | –          |
| <i>Arytinna romeria</i> Percy, 2003 *                             | CA     | C             | <i>Teline rosmarinifolia</i>                                                                                                                          | Fabaceae   | –          |
| <i>Arytinna umbonata</i> (Loginova, 1976) *                       | MA     |               | <i>Genista tenera</i>                                                                                                                                 | Fabaceae   | –          |
| <i>Cacopsylla atlantica</i> (Loginova, 1976) *                    | CA, MA | P,G,T,C       | <i>Salix canariensis</i>                                                                                                                              | Salicaceae | cox1, cytb |
| <i>Cacopsylla crenulatae</i> Bastin, Burckhardt & Ouvrard, 2023 * | CA     | G,T           | <i>Rhamnus crenulata</i>                                                                                                                              | Rhamnaceae | cox1, cytb |
| <i>Cacopsylla exima</i> (Loginova, 1976) *                        | CA, MA | T             | <i>Rhamnus glandulosa</i>                                                                                                                             | Rhamnaceae | cox1       |

|                                                                         |                              |         |                                |                |                 |
|-------------------------------------------------------------------------|------------------------------|---------|--------------------------------|----------------|-----------------|
| <i>Cacopsylla falcicauda</i> Bastin, Burckhardt & Ouvrard, 2023 *       | CA                           | G       | <i>Rhamnus glandulosa</i>      | Rhamnaceae     | cox1, cytb      |
| <i>Diaphorina continua</i> Loginova, 1972                               | Western Mediterranean,<br>CA | F,L     | Unknown                        | Unknown        | –               |
| <i>Diaphorina gonzalezi</i> Bastin, Burckhardt & Ouvrard, 2023 *        | CA                           | T       | <i>Gymnosporia cassinoides</i> | Celastraceae   | cox1, cytb, mtg |
| <i>Livilla monospermae</i> Hodkinson, 1990 *                            | CA                           | H,P,G,T | <i>Retama rhodorhizoides</i>   | Fabaceae       | mtg             |
| <b>Family: Triozidae</b>                                                |                              |         |                                |                |                 |
| <i>Drepanoza canariensis</i> Bastin, Burckhardt & Ouvrard, 2023 *       | CA                           | T       | <i>Convolvulus canariensis</i> | Convolvulaceae | cox1            |
| <i>Drepanoza fernandesi</i> (Aguiar, 2001) *                            | MA                           |         | <i>Pittosporum coriaceum</i>   | Pittosporaceae | cox1, cytb      |
| <i>Drepanoza fruticulosi</i> Bastin, Burckhardt & Ouvrard, 2023 *       | CA                           | T       | <i>Convolvulus fruticosus</i>  | Convolvulaceae | cox1, cytb      |
| <i>Drepanoza molinai</i> Bastin, Burckhardt & Ouvrard, 2023 *           | CA                           | T       | <i>Withania aristata</i>       | Solanaceae     | cox1, cytb      |
| <i>Drepanoza montanetana</i> (Aguiar, 2001) *                           | CA                           | C       | Unknown                        | Unknown        | –               |
| <i>Drepanoza pittospori</i> (Aguiar, 2001) *                            | MA                           |         | <i>Pittosporum coriaceum</i>   | Pittosporaceae | cox1, cytb      |
| <i>Lauritrioza laurisilvae</i> (Hodkinson, 1990) *                      | CA, MA                       | P,G,T,C | <i>Laurus</i> spp.             | Lauraceae      | cox1, cytb      |
| <i>Percyella benahorita</i> Bastin, Burckhardt & Ouvrard, 2023 *        | CA                           | P       | <i>Convolvulus floridus</i>    | Convolvulaceae | cox1, mtg       |
| <i>Percyella canari</i> Bastin, Burckhardt & Ouvrard, 2023 *            | CA                           | T,C     | <i>Convolvulus floridus</i>    | Convolvulaceae | cox1            |
| <i>Percyella gomerita</i> Bastin, Burckhardt & Ouvrard, 2023 *          | CA                           | G       | <i>Convolvulus floridus</i>    | Convolvulaceae | cox1, cytb      |
| <i>Percyella guanche</i> Bastin, Burckhardt & Ouvrard, 2023 *           | CA                           | P,T     | <i>Convolvulus floridus</i>    | Convolvulaceae | cox1, cytb      |
| <i>Spanioza</i> sp. [cf. <i>coquempoti</i> Burckhardt & Lauterer, 2006] | CA                           | C       | No information                 | No information | –               |

**Table 2. Summary of the distribution, host plants and molecular data for the non-native psyllid taxa of the central Macaronesian islands.**

Abbreviations: CA: Canary Islands, MA: Madeira; H: El Hierro, P: La Palma, G: La Gomera, T: Tenerife, C: Gran Canaria, F: Fuerteventura, L: Lanzarote. Molecular data: cox1: cytochrome oxidase 1, cytb: cytochrome B, mtg: obtained from Percy et al. (2018). Host plant records in Macaronesia (all records from Canary Islands) are given if known.

| Species                                           | Archipelago | CA island   | Recorded host plants in Macaronesia                                                                                             | Host plant family | Molecular data  |
|---------------------------------------------------|-------------|-------------|---------------------------------------------------------------------------------------------------------------------------------|-------------------|-----------------|
| <b>Family: Aphalaridae</b>                        |             |             |                                                                                                                                 |                   |                 |
| <i>Ctenarytaina eucalypti</i> (Maskell, 1890)     | CA, MA      | T           | <i>Eucalyptus globulus</i> ,<br><i>Eucalyptus</i> sp.                                                                           | Myrtaceae         | cox1, cytb      |
| <i>Ctenarytaina spatulata</i> Taylor, 1997        | MA          |             | <i>Eucalyptus globulus</i>                                                                                                      | Myrtaceae         | mtg             |
| <i>Glycaspis brimblecombei</i> Moore, 1964        | CA          | T,C         | <i>Eucalyptus</i> sp.                                                                                                           | Myrtaceae         | cox1, cytb      |
| <b>Family: Carsidaridae</b>                       |             |             |                                                                                                                                 |                   |                 |
| <i>Macrohormotoma gladiata</i> Kuwayama, 1908     | CA          | T,L         | <i>Ficus microcarpa</i>                                                                                                         | Moraceae          | cox1, cytb, mtg |
| <b>Family: Psyllidae</b>                          |             |             |                                                                                                                                 |                   |                 |
| <i>Acizzia acaciaebaileyanae</i> (Froggatt, 1901) | CA          | P           | No information                                                                                                                  | No information    | –               |
| <i>Acizzia uncatoides</i> (Ferris & Klyver, 1932) | CA, MA      | H,P,G,T,F,L | <i>Acacia baileyana</i> , <i>A. cyclops</i> ,<br><i>A. longifolia</i> , <i>A. mearnsii</i> ,<br><i>Paraserianthes lophantha</i> | Fabaceae          | cox1, cytb, mtg |
| <i>Cacopsylla fulguralis</i> (Kuwayama, 1908)     | MA          |             | <i>Elaeagnus pungens</i> v.<br><i>variegata</i>                                                                                 | Elaeagnaceae      | –               |
| <i>Cacopsylla pyri</i> (Linnaeus, 1758)           | MA          |             | <i>Pyrus communis</i>                                                                                                           | Rosaceae          | mtg             |
| <i>Heteropsylla cubana</i> Crawford, 1914         | CA          | G,T         | <i>Leucaena leucocephala</i>                                                                                                    | Fabaceae          | cox1, cytb, mtg |
| <i>Platycorypha nigrivirga</i> Burckhardt, 1987   | CA, MA      | T           | <i>Tipuana tipu</i>                                                                                                             | Fabaceae          | cox1, cytb      |
| <b>Family: Trioizidae</b>                         |             |             |                                                                                                                                 |                   |                 |

|                                               |        |               |                                                                       |               |                 |
|-----------------------------------------------|--------|---------------|-----------------------------------------------------------------------|---------------|-----------------|
| <i>Bactericera tremblayi</i> (Wagner, 1961)   | CA     | T             | <i>Allium cepa</i> , <i>Allium ampeloprasum</i> var. <i>porrum</i>    | Liliaceae     | cox1, cytb      |
| <i>Bactericera trigonica</i> Hodkinson, 1981  | CA     | T,C           | <i>Daucus carota</i>                                                  | Apiaceae      | cox1, mtg       |
| <i>Heterotrioza chenopodii</i> (Reuter, 1876) | CA, MA | H,P,G,T,C,F,L | <i>Chenopodium album</i> , <i>C. murale</i> , <i>Chenopodium</i> spp. | Amaranthaceae | cox1, cytb, mtg |
| <i>Trioza erythrae</i> (Del Guercio, 1918)    | CA, MA | H,P,G,T,C     | <i>Citrus</i> spp.                                                    | Rutaceae      | cox1, cytb, mtg |
| <i>Trioza urticae</i> (Linnaeus, 1758)        | MA     |               | <i>Urtica</i> sp.                                                     | Urticeae      | mtg             |

**Table 3. Summary of the specimens of four *Percyella* species used in the phylogenetic and haplotype analyses.** Abbreviations: % max div.: maximum intraspecific cox1 divergence (uncorrected p-distances). Island: Is. P: La Palma, G: La Gomera, T: Tenerife, C: Gran Canaria. Sites are shown in Figs. 2, 3. Variation in sequence length obtained for all *Percyella* specimens is shown in Supporting Information (Figs S1-S3).

| Species (% max div.)        | Specimen ID (# indiv.)    | Coll. date    | Is. | Site | GPS                      | Elev.(m) | Region               |
|-----------------------------|---------------------------|---------------|-----|------|--------------------------|----------|----------------------|
| <i>P. guanche</i><br>(3.1%) | PN118 (2),<br>PN119       | 20 March 2020 | T   | T5   | 28.521110,<br>-16.335329 | 410      | Tegueste             |
|                             | PN140,<br>PN141           | 01 March 2022 | T   | T1   | 28.369439,<br>-16.849553 | 130      | Buenavista del Norte |
|                             | PN142,<br>PN143,<br>PN144 | 01 March 2022 | T   | T2   | 28.366387,<br>-16.774888 | 320      | El Tanque            |
|                             | PN146                     | 01 March 2022 | T   | T3   | 28.373472,<br>-16.745087 | 70       | El Guincho           |
|                             | PN147,<br>PN148           | 06 March 2022 | T   | T6   | 28.565124,<br>-16.214306 | 100      | Taganana             |
|                             | PN149,<br>PN150           | 16 March 2022 | T   | T7   | 28.515867,<br>-16.176825 | 130      | Las Gaviotas         |
|                             | PN151,<br>PN152           | 16 March 2022 | T   | T8   | 28.552697,<br>-16.343148 | 64       | Bajamar              |

|                                    |                     |                 |   |    |                            |     |                           |
|------------------------------------|---------------------|-----------------|---|----|----------------------------|-----|---------------------------|
|                                    | PN97                | 08 January 2022 | P | P9 | 28.6493135,<br>-17.9015229 | 390 | El Paso                   |
|                                    | PN98                | 08 January 2022 | P | P9 | 28.6493135,<br>-17.9015229 | 390 | El Paso                   |
| <i>P.<br/>benahorita</i><br>(4.3%) | PN85, PN86          | 07 January 2022 | P | P1 | 28.6884804,<br>-17.7661645 | 50  | Santa Cruz de La<br>Palma |
|                                    | PN87, PN88          | 07 January 2022 | P | P2 | 28.8119329,<br>-17.7797713 | 120 | Barlovento                |
|                                    | PN89                | 07 January 2022 | P | P3 | 28.8317471,<br>-17.7994751 | 470 | Barlovento                |
|                                    | PN91                | 07 January 2022 | P | P4 | 28.705665,<br>-17.7569     | 80  | Santa Cruz de La<br>Palma |
|                                    | PN92                | 08 January 2022 | P | P5 | 28.66548,<br>-17.76926     | 20  | Breña Alta                |
|                                    | PN93                | 08 January 2022 | P | P6 | 28.660419,<br>-17.792220   | 350 | Breña Alta                |
|                                    | PN94, PN95,<br>PN96 | 08 January 2022 | P | P8 | 28.660200,<br>-17.935223   | 230 | Los Llanos de<br>Aridane  |

|                                  |                                                        |                     |   |           |                            |     |                              |
|----------------------------------|--------------------------------------------------------|---------------------|---|-----------|----------------------------|-----|------------------------------|
|                                  | DP195-98                                               | 18 May 1998         | P | DP1<br>95 | 28.658333,<br>-17.933333   | 200 | Barranco de las<br>Angustias |
| <i>P.<br/>gomerita</i><br>(0.9%) | PN99,<br>PN100,<br>PN101,<br>PN102,<br>PN103,<br>PN104 | 15 January 2022     | G | G1        | 28.184799,<br>-17.193395   | 260 | Agulo                        |
|                                  | PN105                                                  | 15 January 2022     | G | G2        | 28.148807,<br>-17.193500   | 310 | Hemigua                      |
|                                  | PN106,<br>PN107,<br>PN108,<br>PN109                    | 15 January 2022     | G | G3        | 28.1932796,<br>-17.1977888 | 240 | Agulo                        |
|                                  | PN110,<br>PN111                                        | 16 January 2022     | G | G4        | 28.179217,<br>-17.262758   | 210 | Vallehermoso                 |
|                                  | PN112                                                  | 16 January 2022     | G | G7        | 28.061213,<br>-17.225814   | 670 | Alajeró                      |
| <i>P. canari</i><br>(0.6%)       | PN113,<br>PN134,<br>PN135                              | 19 February<br>2022 | C | C1        | 28.135944,<br>-15.580556   | 130 | Moya                         |
|                                  | PN136,<br>PN137                                        | 19 February<br>2022 | C | C2        | 28.125750,<br>-15.568167   | 260 | Moya                         |



|                 |                     |   |    |                          |     |                               |
|-----------------|---------------------|---|----|--------------------------|-----|-------------------------------|
| PN138,<br>PN139 | 19 February<br>2022 | C | C3 | 28.037583,<br>-15.458306 | 560 | Telde                         |
| PN1             | 18 June 2018        | T | T4 | 28.492267,<br>-16.329015 | 570 | San Cristobal de La<br>Laguna |
| PN4             | 03 December<br>2018 | T | T4 | 28.492267,<br>-16.329015 | 570 | San Cristobal de La<br>Laguna |

**Table 4. Primer combinations used to amplify *cox1* with reference, sequence, annealing temperature, and amplicon length.**

Abbreviation: Tm: primer melting temperature.

| Primer            | Reference               | Direction | Sequence (5´-3´)            | Tm (°C) | Amplicon length (bp) |
|-------------------|-------------------------|-----------|-----------------------------|---------|----------------------|
| mtd 6 (C1-J-1718) | Simon et al., 1994      | Forward   | GGAGGATTTGGAAATTGATTAGTTCC  | 50      | 472                  |
| mtd9 (C1-N-2191)  | Simon et al., 1994      | Reverse   | CCCGGTAAAATTTAAAATATAAACTTC |         |                      |
| mtd6 (C1-J-1718)  | Simon et al., 1994      | Forward   | GGAGGATTTGGAAATTGATTAGTTCC  | 50      | 850                  |
| H7005P-R          | Percy & Cronk, 2022     | Reverse   | TGAGCTACTACRTARTATGTRTCATG  |         |                      |
| LCOP-F            | Bastin et al., in press | Forward   | AGAACWAAAYCATAAAAYWATTGG    | 48      | 658                  |
| HCO-2198          | Folmer et al., 1994     | Reverse   | TAAACTTCAGGGTGACCAAAAAATCA  |         |                      |
| tRWF1             | Park et al., 2010       | Forward   | AACTAATARCCTCAAAG           | 50      | ±860                 |
| LepR1             | Hebert et al., 2004     | Reverse   | TAAACTTCTGGATGTCCAAAAAATCA  |         |                      |

## Supporting Information

**S1 Table. Summary of all non-Macaronesian psyllid taxa for which molecular data was generated.** Molecular data: cox1: cytochrome oxidase 1, cytb: cytochrome B.

**S2 Table. Summary of Macaronesian endemic *Convolvulus* species (Gobierno de Canarias 2023) surveyed during this study with distribution of *Convolvulus*-feeding psyllids.** Abbreviations: H: El Hierro, P: La Palma, G: La Gomera, T: Tenerife, C: Gran Canaria, F: Fuerteventura, L: Lanzarote.

**S3 Table. Host plant genera of the Central Macaronesian native psyllids with the number of Canarian and Macaronesian endemic and non-endemic species (Gobierno de Canarias, 2023).**

**S4 Table. Summary of the endemic central Macaronesian psyllid species and lineages (if in situ diversification occurred), indicating number of species per lineage, host plant, and the distribution and host plant of the closest sister group (where relationship is resolved with 80% or greater bootstrap support).**

**S1 Fig. Neighbor-joining analysis using cox1 data for *Percyella*, *Drepanoza*, and select outgroup taxa from Group A (Percy et al. 2018).** Full length sequences were used for the *Percyella* samples (sequence length shown with sample code).

**S2 Fig. Bayesian analysis using cox1 data for *Percyella*, *Drepanoza*, and select outgroup taxa from Group A (Percy et al. 2018).** Full length sequences were used for the *Percyella* samples (sequence length shown with sample code).

**S3 Fig. Maximum-likelihood analysis using cox1 data for *Percyella*, *Drepanoza*, and select outgroup taxa from Group A (Percy et al. 2018).** Full length sequences were used for the *Percyella* samples (sequence length shown with sample code).

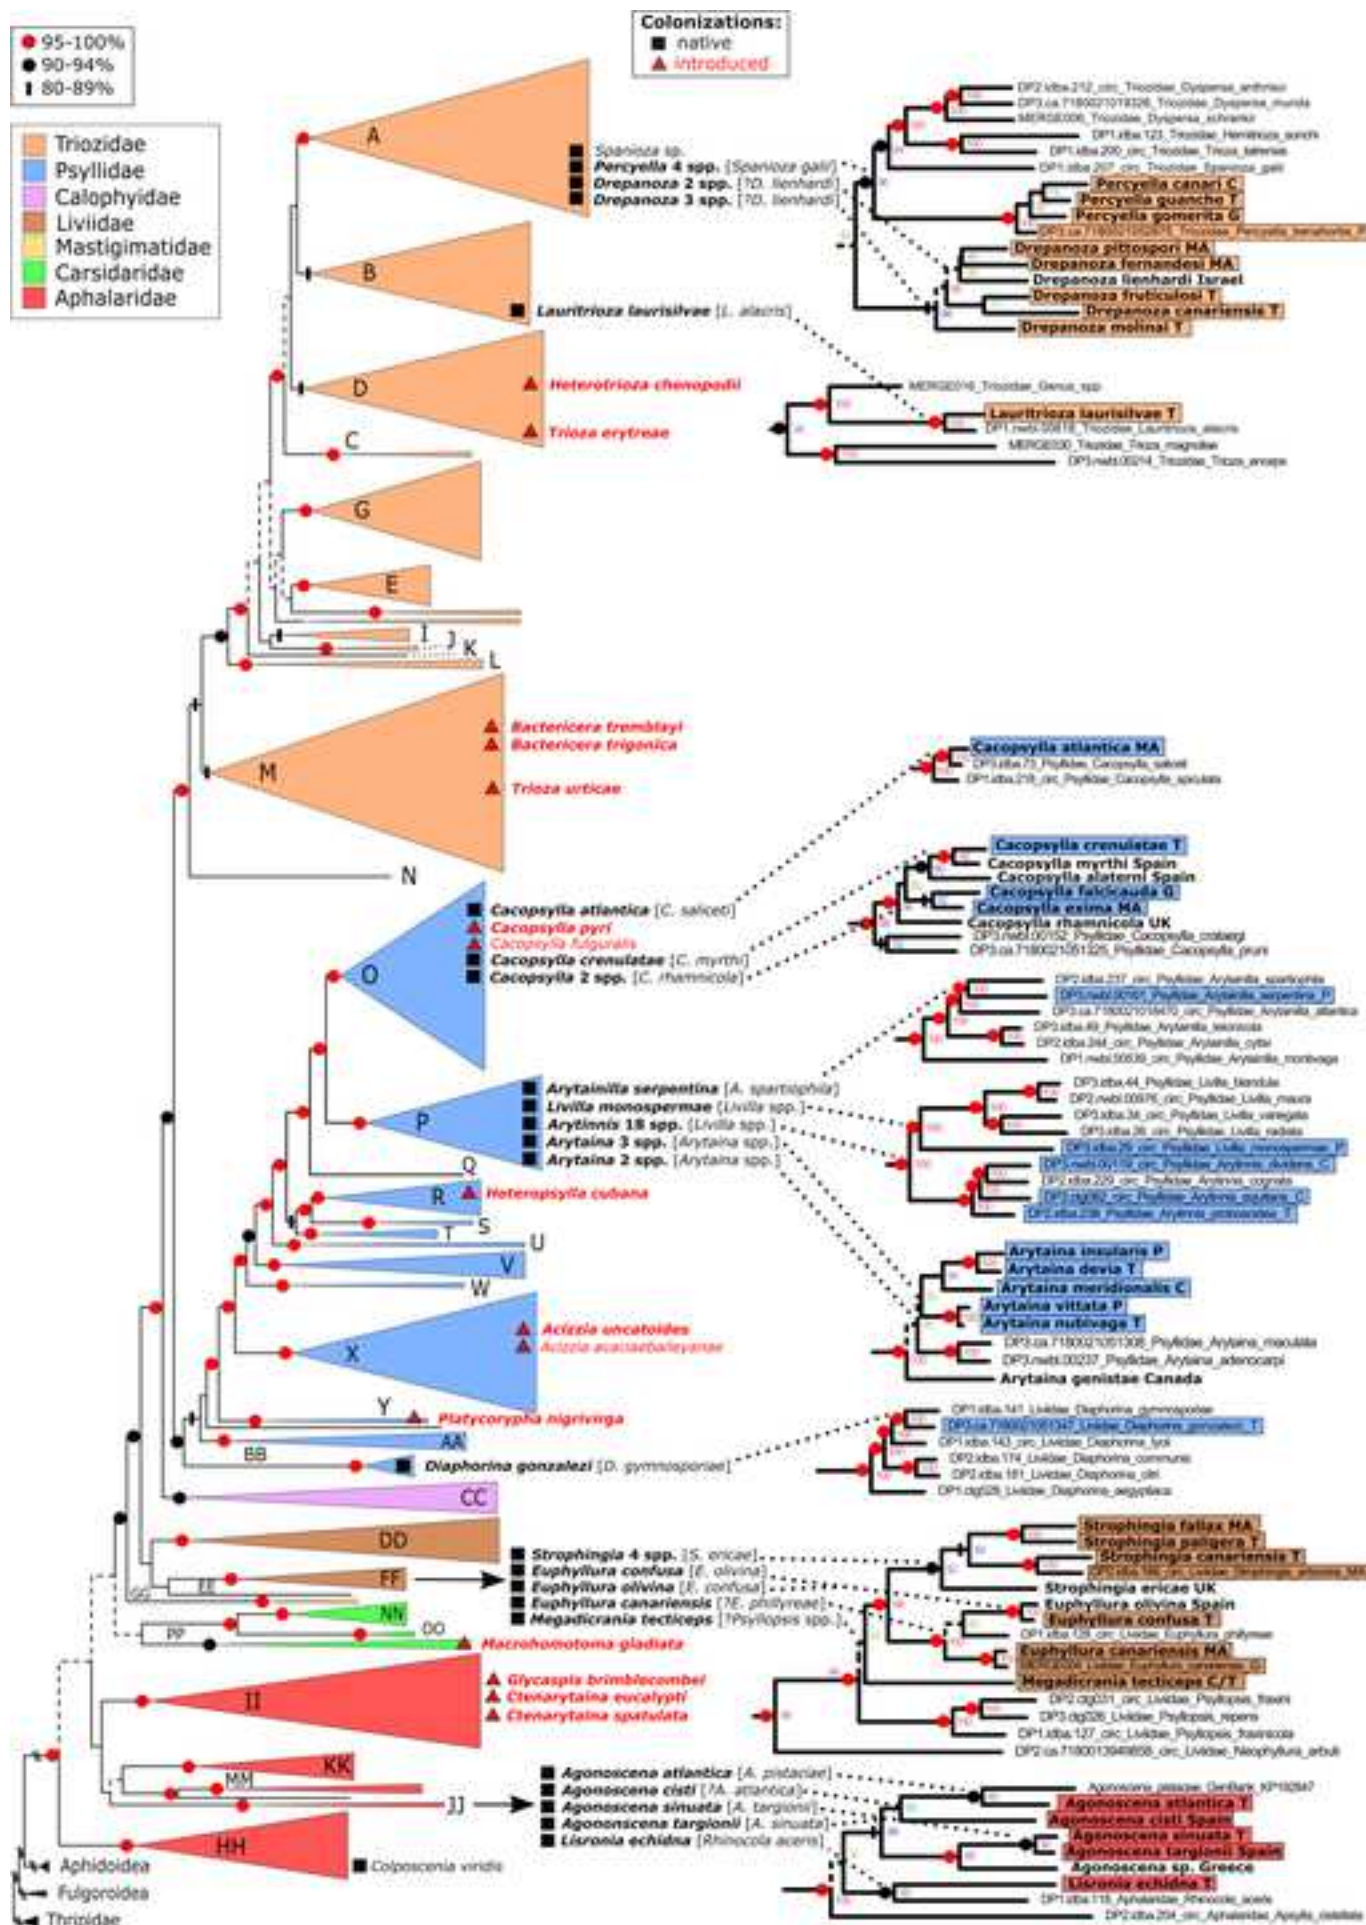

Figure 2

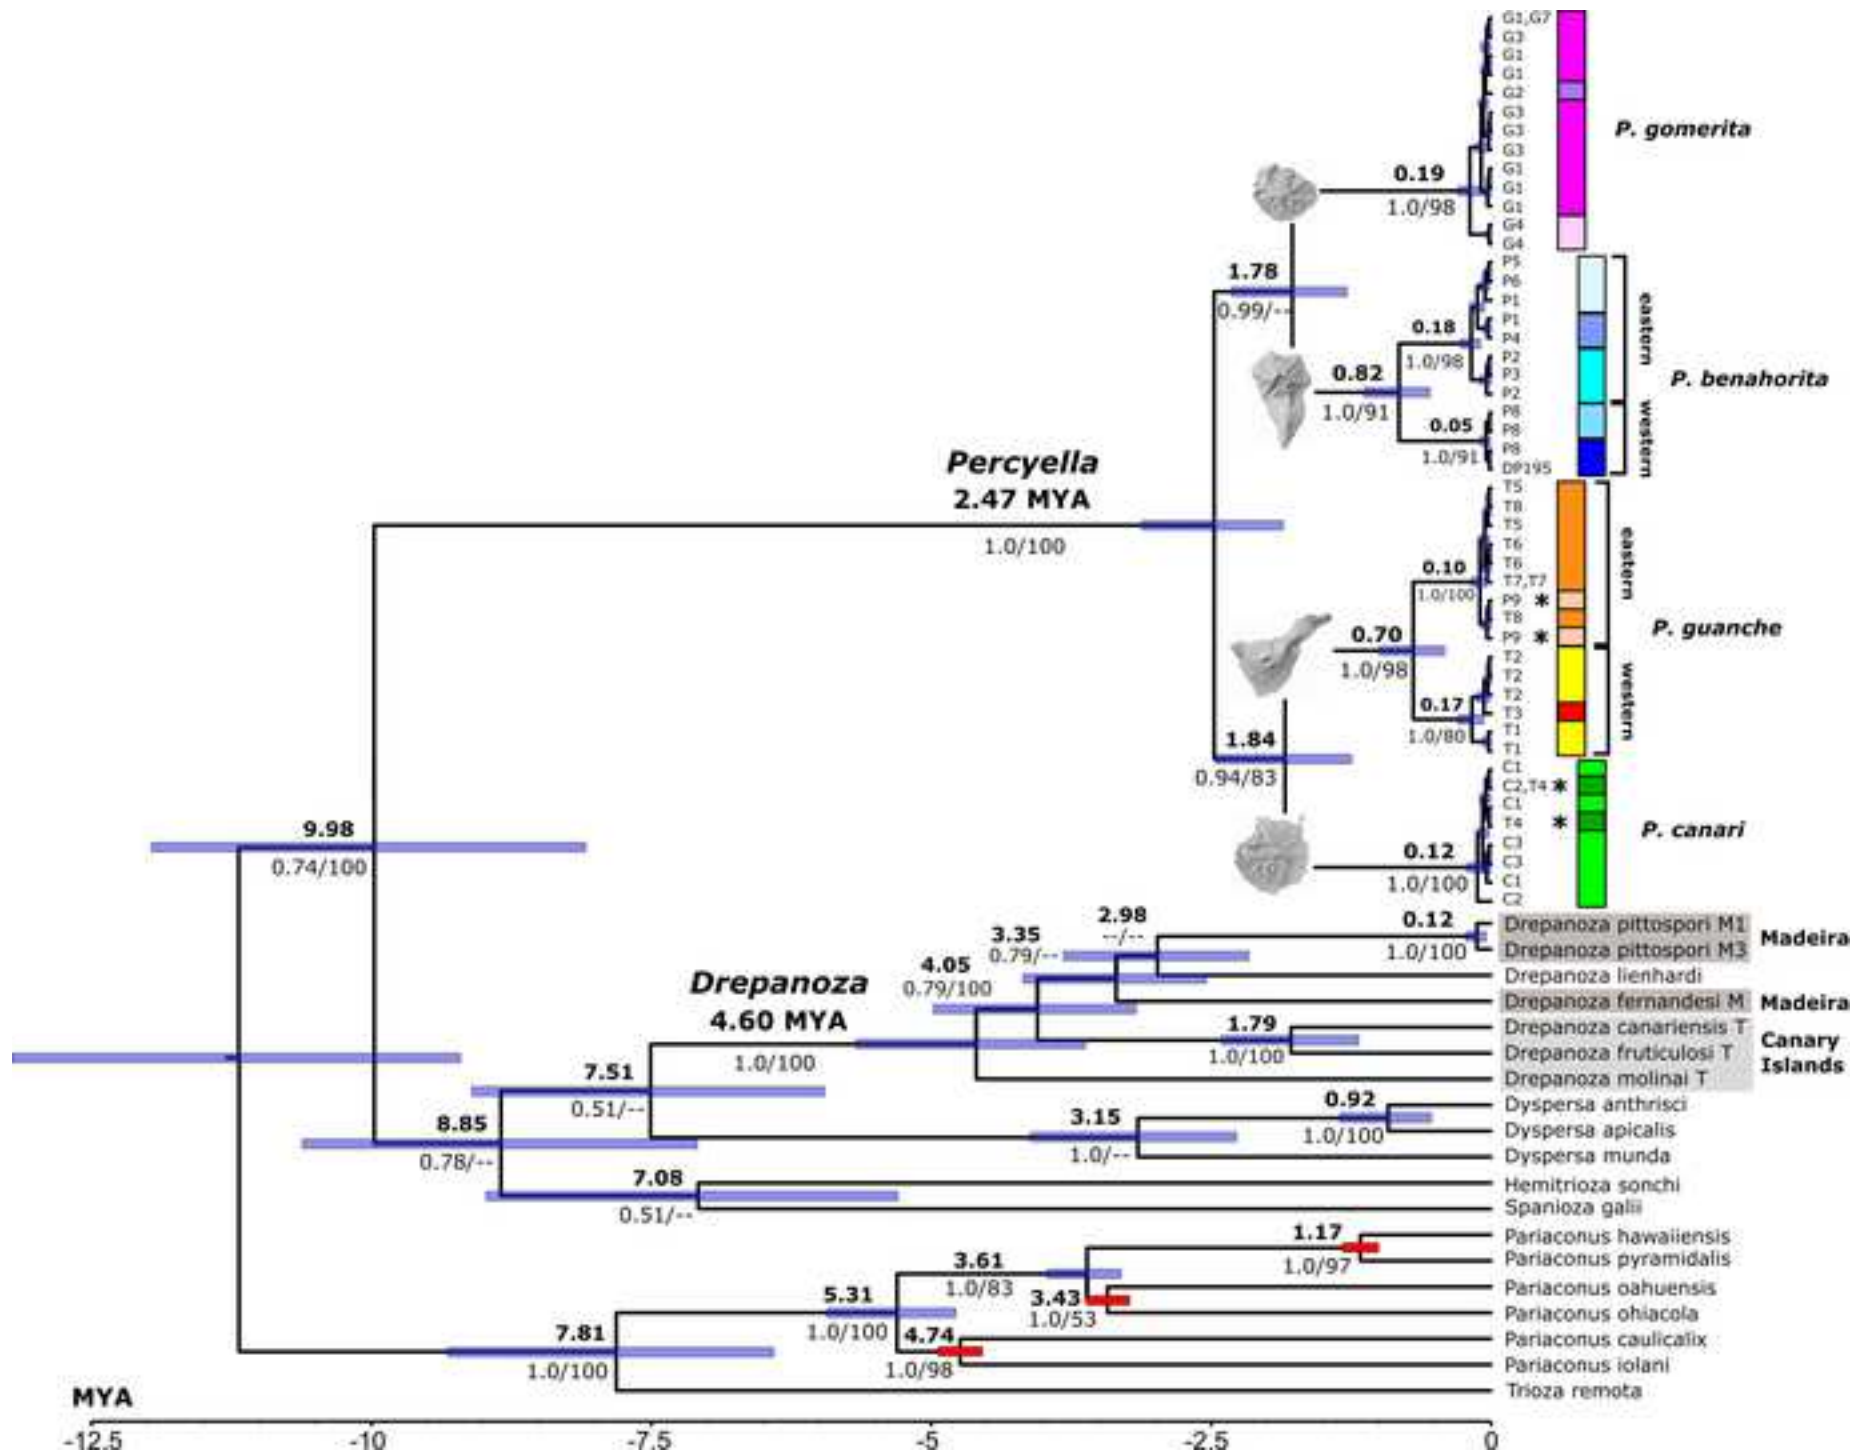



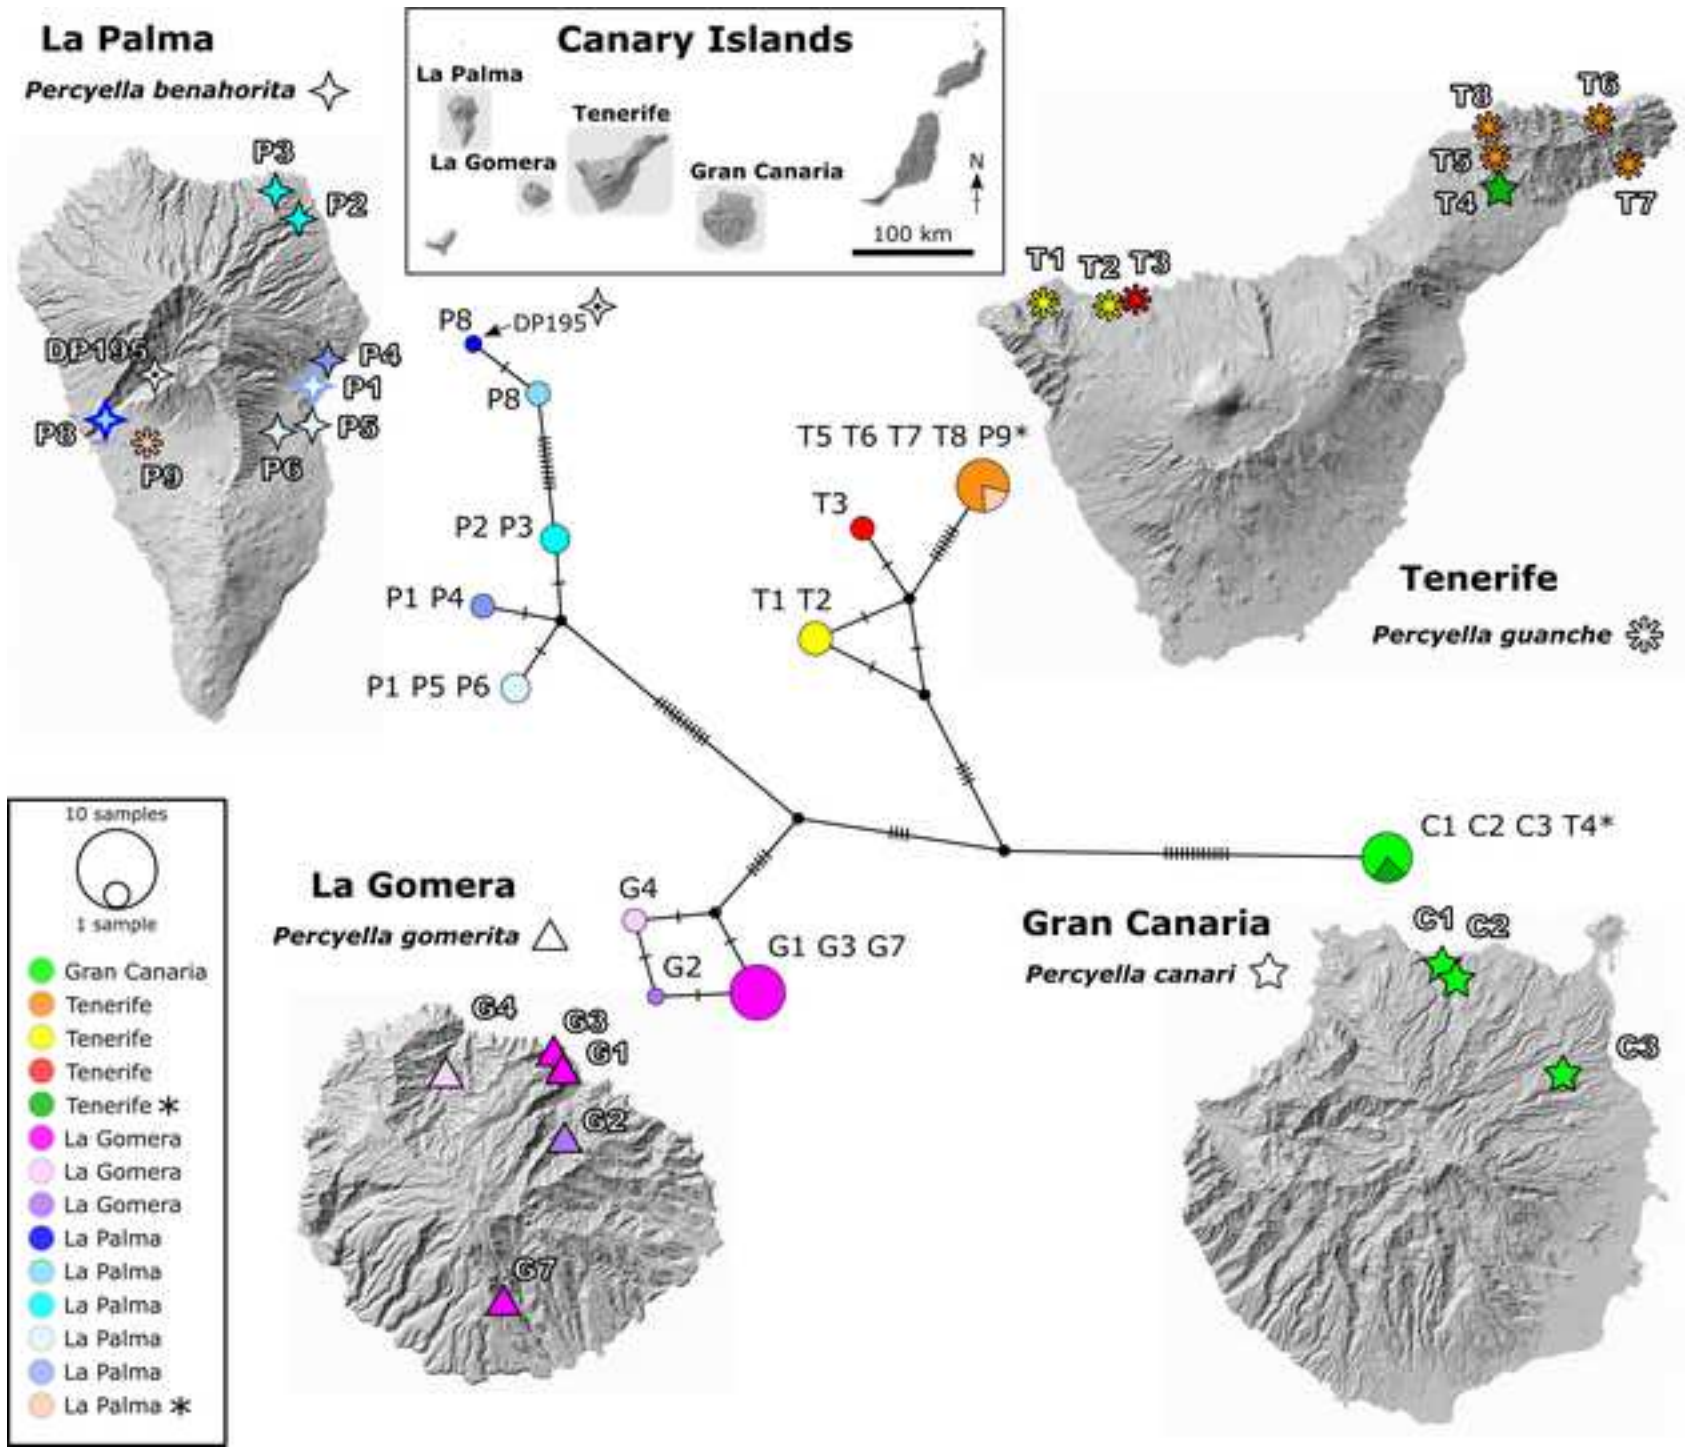



Click here to access/download

**Supporting Information**

S1\_S2\_S3\_S4\_Supporting Information Tables  
PERCY.pdf



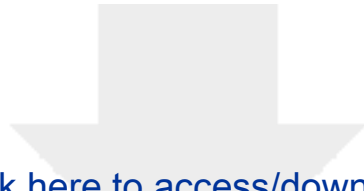

Click here to access/download

**Supporting Information**

S1\_S2\_S3\_Supporting Information Figures PERCY.pdf

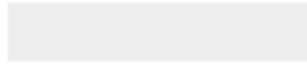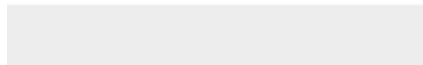

Supplement: pone.0297062.s008.pdf [file pone.0297062.s008.pdf]
