# Supplementary material for: Origins of the central Macaronesian psyllid lineages (Hemiptera; Psylloidea) with characterization of a new island radiation on endemic Convolvulus floridus (Convolvulaceae) in the Canary Islands
Source: PubMed Central journal article supplement (PMC10817144; doi:10.1371/journal.pone.0297062), 2024-01-26

## Supporting Information – Figure S1

### Origins of the central Macaronesian psyllid lineages (Hemiptera; Psylloidea) with characterization of a new island radiation on endemic *Convolvulus floridus* (Convolvulaceae) in the Canary Islands

Saskia Bastin<sup>1</sup>, J. Alfredo Reyes-Betancort<sup>2</sup>, Felipe Siverio de la Rosa<sup>1</sup> and Diana M. Percy<sup>3\*</sup>

<sup>1</sup>Instituto Canario de Investigaciones Agrarias, Unidad de Protección Vegetal, C/ El Boquerón s/n, 38200, La Laguna, Tenerife, Spain.

E-mail: bastin.saskia@hotmail.be; <https://orcid.org/0000-0001-9307-7223>

E-mail: fsiverio@icia.es; <https://orcid.org/0000-0002-8886-414X>

<sup>2</sup>Instituto Canario de Investigaciones Agrarias, Jardín de Aclimatación de La Oratava, C/ Retama 2, 38400 Puerto de la Cruz, Tenerife, Spain.

E-mail: areyes@icia.es; <https://orcid.org/0000-0003-0732-3219>

<sup>3</sup>Botany Department and Biodiversity Research Centre, University of British Columbia, Vancouver, British Columbia, Canada.

E-mail: diana.percy@ubc.ca; <https://orcid.org/0000-0002-0468-2892>

\*Corresponding author E-mail: diana.percy@ubc.ca

**Figure S1. Neighbor-joining analysis using *cox1* data for *Percyella*, *Drepanoza*, and select outgroup taxa from Group A (Percy et al. 2018) [52]. Full length sequences were used for the *Percyella* samples (sequence length shown with sample code).**

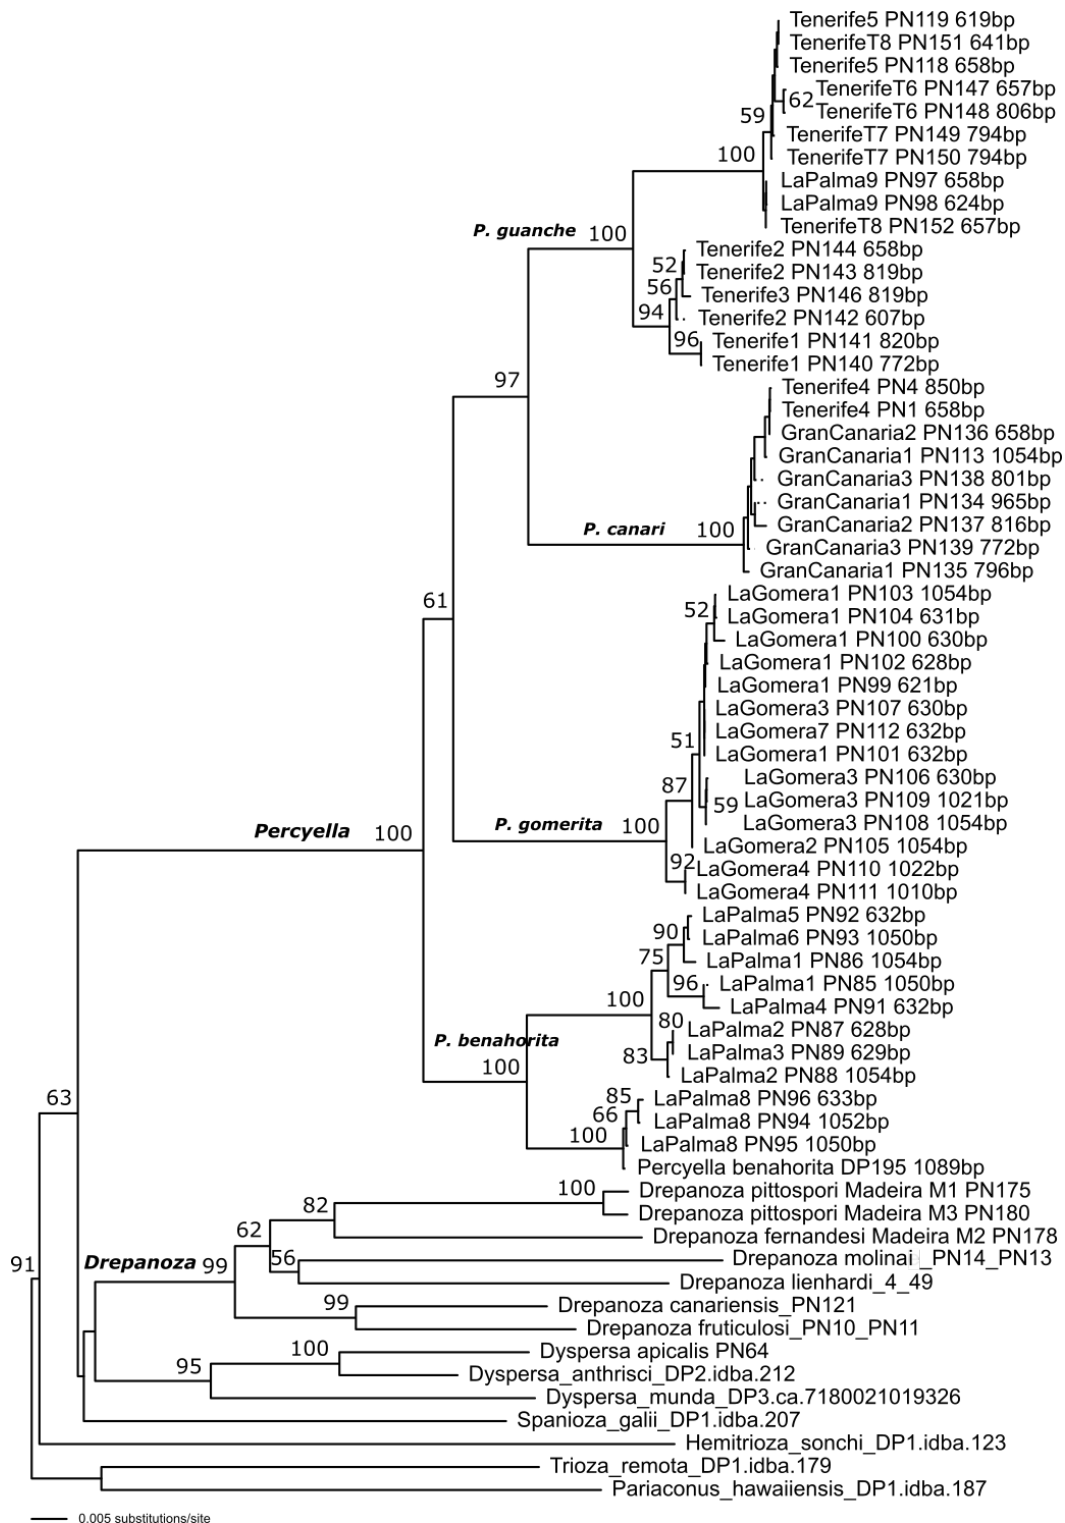

Supplement: pone.0297062.s001.pdf [file pone.0297062.s001.pdf]
