# Supplementary material for: Origins of the central Macaronesian psyllid lineages (Hemiptera; Psylloidea) with characterization of a new island radiation on endemic Convolvulus floridus (Convolvulaceae) in the Canary Islands
Source: PubMed Central journal article supplement (PMC10817144; doi:10.1371/journal.pone.0297062), 2024-01-26
Supplement: pone.0297062.s004.pdf [file pone.0297062.s004.pdf]

## Supporting Information – Table S1

### Origins of the central Macaronesian psyllid lineages (Hemiptera; Psylloidea) with characterization of a new island radiation on endemic *Convolvulus floridus* (Convolvulaceae) in the Canary Islands

Saskia Bastin<sup>1</sup>, J. Alfredo Reyes-Betancort<sup>2</sup>, Felipe Siverio de la Rosa<sup>1</sup> and Diana M. Percy<sup>3\*</sup>

<sup>1</sup>Instituto Canario de Investigaciones Agrarias, Unidad de Protección Vegetal, C/ El Boquerón s/n, 38200, La Laguna, Tenerife, Spain.

E-mail: bastin.saskia@hotmail.be; <https://orcid.org/0000-0001-9307-7223>

E-mail: fsiverio@icia.es; <https://orcid.org/0000-0002-8886-414X>

<sup>2</sup>Instituto Canario de Investigaciones Agrarias, Jardín de Aclimatación de La Oratava, C/ Retama 2, 38400 Puerto de la Cruz, Tenerife, Spain.

E-mail: areyes@icia.es; <https://orcid.org/0000-0003-0732-3219>

<sup>3</sup>Botany Department and Biodiversity Research Centre, University of British Columbia, Vancouver, British Columbia, Canada.

E-mail: diana.percy@ubc.ca; <https://orcid.org/0000-0002-0468-2892>

\*Corresponding author E-mail: diana.percy@ubc.ca

**Supporting Information Table S1. Summary of all non-Macaronesian psyllid taxa for which molecular data was generated.**

Molecular data: cox1: cytochrome oxidase 1, cytb: cytochrome B.

| Species                                          | Collection locality | Collection date                              | Host plant                   | Molecular data |
|--------------------------------------------------|---------------------|----------------------------------------------|------------------------------|----------------|
| <i>Agonoscena cisti</i> (Puton, 1882)            | Spain               | 19 April 2016                                | <i>Pistacia</i> sp.          | cox1, cytb     |
| <i>Agonoscena targionii</i> (Lichtenstein, 1874) | Spain               | 19 April 2016                                | <i>Pistacia</i> sp.          | cox1, cytb     |
| <i>Arytaina genistae</i> (Latreille, 1804)       | Canada              | 2014                                         | <i>Cytisus scoparius</i>     | cox1, cytb     |
| <i>Cacopsylla alaterni</i> (Foerster, 1848)      | France              | 15-20 April 1990                             | No information               | cox1, cytb     |
| <i>Cacopsylla alaterni</i> (Foerster, 1848)      | Spain               | 23 Dec 1997, 24 March 1998,<br>19 April 2016 | <i>Rhamnus alaternus</i>     | cox1, cytb     |
| <i>Cacopsylla myrthi</i> (Puton, 1876)           | Israel              | 07 May 2010                                  | "conifers"                   | cox1, cytb     |
| <i>Cacopsylla myrthi</i> (Puton, 1876)           | Spain               | 23 Dec 1997                                  | <i>Rhamnus alaternus</i>     | cox1, cytb     |
| <i>Cacopsylla rhamnicola</i> (Scott, 1876)       | UK                  | 2003                                         | <i>Rhamnus catharticus</i>   | cox1, cytb     |
| <i>Drepanoza lienhardi</i> (Burckhardt, 1981)    | Israel              | 06 May 2010                                  | <i>Lycium schweinfurthii</i> | cox1           |
| <i>Euphyllura olivina</i> (Costa, 1839)          | Spain               | May 2021                                     | <i>Olea europaea</i>         | cox1           |
| <i>Strophingia ericae</i> (Curtis, 1835)         | UK                  | 1994                                         | No information               | cytb           |
