# Supplementary material for: Origins of the central Macaronesian psyllid lineages (Hemiptera; Psylloidea) with characterization of a new island radiation on endemic Convolvulus floridus (Convolvulaceae) in the Canary Islands
Source: PubMed Central journal article supplement (PMC10817144; doi:10.1371/journal.pone.0297062), 2024-01-26
Supplement: pone.0297062.s005.pdf [file pone.0297062.s005.pdf]

## Supporting Information – Table S2

### Origins of the central Macaronesian psyllid lineages (Hemiptera; Psylloidea) with characterization of a new island radiation on endemic *Convolvulus floridus* (Convolvulaceae) in the Canary Islands

Saskia Bastin<sup>1</sup>, J. Alfredo Reyes-Betancort<sup>2</sup>, Felipe Siverio de la Rosa<sup>1</sup> and Diana M. Percy<sup>3\*</sup>

<sup>1</sup>Instituto Canario de Investigaciones Agrarias, Unidad de Protección Vegetal, C/ El Boquerón s/n, 38200, La Laguna, Tenerife, Spain.

E-mail: bastin.saskia@hotmail.be; <https://orcid.org/0000-0001-9307-7223>

E-mail: fsiverio@icia.es; <https://orcid.org/0000-0002-8886-414X>

<sup>2</sup>Instituto Canario de Investigaciones Agrarias, Jardín de Aclimatación de La Oratava, C/ Retama 2, 38400 Puerto de la Cruz, Tenerife, Spain.

E-mail: areyes@icia.es; <https://orcid.org/0000-0003-0732-3219>

<sup>3</sup>Botany Department and Biodiversity Research Centre, University of British Columbia, Vancouver, British Columbia, Canada.

E-mail: diana.percy@ubc.ca; <https://orcid.org/0000-0002-0468-2892>

\*Corresponding author E-mail: diana.percy@ubc.ca

**Supporting Information Table S2. Summary of Macaronesian endemic *Convolvulus* species (Gobierno de Canarias 2023) [13] surveyed during this study with distribution of *Convolvulus*-feeding psyllids.** Abbreviations: H: El Hierro, P: La Palma, G: La Gomera, T: Tenerife, C: Gran Canaria, F: Fuerteventura, L: Lanzarote.

| <i>Convolvulus</i> species                              | Distribution | Island surveyed | Psyllid species                                    |
|---------------------------------------------------------|--------------|-----------------|----------------------------------------------------|
| <i>Convolvulus canariensis</i>                          | H,P,G,T,C    | P,G,T           | <i>Drepanoza canariensis</i>                       |
| <i>Convolvulus caput-medusae</i>                        | C,F          | C               | none                                               |
| <i>Convolvulus floridus</i>                             | P,G,T,C,F,L  | P,G,T,C,L       | all four <i>Percyella</i> spp. (none in Lanzarote) |
| <i>Convolvulus fruticosus</i> subsp. <i>fruticosus</i>  | H,P,T        | T               | <i>Drepanoza fruticosi</i>                         |
| <i>Convolvulus fruticosus</i> subsp. <i>glandulosus</i> | C            | –               | [?] not surveyed                                   |
| <i>Convolvulus lopezsocasii</i>                         | L            | L               | none                                               |
| <i>Convolvulus perraudieri</i>                          | T,C          | T               | none                                               |
| <i>Convolvulus scoparius</i>                            | H,P,G,T,C    | T               | none                                               |
| <i>Convolvulus subauriculatus</i>                       | G            | G               | none                                               |
| <i>Convolvulus volubilis</i>                            | G,T          | G               | none                                               |
