# Supplementary material for: Origins of the central Macaronesian psyllid lineages (Hemiptera; Psylloidea) with characterization of a new island radiation on endemic Convolvulus floridus (Convolvulaceae) in the Canary Islands
Source: PubMed Central journal article supplement (PMC10817144; doi:10.1371/journal.pone.0297062), 2024-01-26
Supplement: pone.0297062.s006.pdf [file pone.0297062.s006.pdf]

## Supporting Information – Table S3

### Origins of the central Macaronesian psyllid lineages (Hemiptera; Psylloidea) with characterization of a new island radiation on endemic *Convolvulus floridus* (Convolvulaceae) in the Canary Islands

Saskia Bastin<sup>1</sup>, J. Alfredo Reyes-Betancort<sup>2</sup>, Felipe Siverio de la Rosa<sup>1</sup> and Diana M. Percy<sup>3\*</sup>

<sup>1</sup>Instituto Canario de Investigaciones Agrarias, Unidad de Protección Vegetal, C/ El Boquerón s/n, 38200, La Laguna, Tenerife, Spain.

E-mail: bastin.saskia@hotmail.be; <https://orcid.org/0000-0001-9307-7223>

E-mail: fsiverio@icia.es; <https://orcid.org/0000-0002-8886-414X>

<sup>2</sup>Instituto Canario de Investigaciones Agrarias, Jardín de Aclimatación de La Oratava, C/ Retama 2, 38400 Puerto de la Cruz, Tenerife, Spain.

E-mail: areyes@icia.es; <https://orcid.org/0000-0003-0732-3219>

<sup>3</sup>Botany Department and Biodiversity Research Centre, University of British Columbia, Vancouver, British Columbia, Canada.

E-mail: diana.percy@ubc.ca; <https://orcid.org/0000-0002-0468-2892>

\*Corresponding author E-mail: diana.percy@ubc.ca

**Supporting Information Table S3. Host plant genera of the Central Macaronesian native psyllids with the number of Canarian and Macaronesian endemic and non-endemic species (Gobierno de Canarias, 2023) [13].**

| <b>Host plant genus</b> | <b>Canarian endemic species</b> | <b>Macaronesian endemic species</b> | <b>Non-endemic species</b> |
|-------------------------|---------------------------------|-------------------------------------|----------------------------|
| <i>Pistacia</i>         |                                 |                                     | 2                          |
| <i>Ruta</i>             | 4                               |                                     | 2                          |
| <i>Cistus</i>           | 8                               |                                     | 2                          |
| <i>Picconia</i>         | 1                               |                                     |                            |
| <i>Olea</i>             | 1                               |                                     | 1                          |
| <i>Erica</i>            | 1                               | 1                                   |                            |
| <i>Chamaecytisus</i>    | 1                               |                                     | ?                          |
| <i>Spartocytisus</i>    | 2                               |                                     |                            |
| <i>Teline</i>           | 9                               |                                     |                            |
| <i>Adenocarpus</i>      | 3                               |                                     |                            |
| <i>Salix</i>            |                                 | 1                                   |                            |
| <i>Rhamnus</i>          | 2                               | 1                                   | 1                          |
| <i>Gymnosporia</i>      | 2                               |                                     |                            |
| <i>Retama</i>           | 1                               |                                     |                            |
| <i>Convolvulus</i>      | 9                               |                                     | 5                          |
| <i>Laurus</i>           | 1                               |                                     | 1                          |
| <i>Withania</i>         | 1                               |                                     | 2                          |
