# Supplementary material for: Origins of the central Macaronesian psyllid lineages (Hemiptera; Psylloidea) with characterization of a new island radiation on endemic Convolvulus floridus (Convolvulaceae) in the Canary Islands
Source: PubMed Central journal article supplement (PMC10817144; doi:10.1371/journal.pone.0297062), 2024-01-26
Supplement: pone.0297062.s007.pdf [file pone.0297062.s007.pdf]

## Supporting Information – Table S4

### Origins of the central Macaronesian psyllid lineages (Hemiptera; Psylloidea) with characterization of a new island radiation on endemic *Convolvulus floridus* (Convolvulaceae) in the Canary Islands

Saskia Bastin<sup>1</sup>, J. Alfredo Reyes-Betancort<sup>2</sup>, Felipe Siverio de la Rosa<sup>1</sup> and Diana M. Percy<sup>3\*</sup>

<sup>1</sup>Instituto Canario de Investigaciones Agrarias, Unidad de Protección Vegetal, C/ El Boquerón s/n, 38200, La Laguna, Tenerife, Spain.

E-mail: bastin.saskia@hotmail.be; <https://orcid.org/0000-0001-9307-7223>

E-mail: fsiverio@icia.es; <https://orcid.org/0000-0002-8886-414X>

<sup>2</sup>Instituto Canario de Investigaciones Agrarias, Jardín de Aclimatación de La Oratava, C/ Retama 2, 38400 Puerto de la Cruz, Tenerife, Spain.

E-mail: areyes@icia.es; <https://orcid.org/0000-0003-0732-3219>

<sup>3</sup>Botany Department and Biodiversity Research Centre, University of British Columbia, Vancouver, British Columbia, Canada.

E-mail: diana.percy@ubc.ca; <https://orcid.org/0000-0002-0468-2892>

\*Corresponding author E-mail: diana.percy@ubc.ca

**Supporting Information Table S4. Summary of the endemic central Macaronesian psyllid species and lineages (if in situ diversification occurred), indicating number of species per lineage, host plant, and the distribution and host plant of the closest sister group (where relationship is resolved with 80% or greater bootstrap support).**

| Species/lineage               | Species number | Host plant family | Host plant species/lineage                                                                 | Sister group                    | Sister group distribution | Sister group host plant family | Host plant species/genus for sister group                                                                     |
|-------------------------------|----------------|-------------------|--------------------------------------------------------------------------------------------|---------------------------------|---------------------------|--------------------------------|---------------------------------------------------------------------------------------------------------------|
| <i>Agonoscena atlantica</i>   | 1              | Anacardiaceae     | <i>Pistacia atlantica</i>                                                                  | <i>Agonoscena pistaciae</i>     | Mediterranean             | Anacardiaceae                  | <i>Pistacia</i> spp. including <i>Pistacia atlantica</i>                                                      |
| <i>Agonoscena sinuata</i>     | 1              | Rutaceae          | <i>Ruta pinnata</i>                                                                        | <i>Agonoscena targionii</i>     | Mediterranean             | Anacardiaceae                  | <i>Pistacia</i> ssp.                                                                                          |
| <i>Lisronia echidna</i>       | 1              | Cistaceae         | <i>Cistus monspeliensis</i>                                                                | <i>Rhinocola aceris</i>         | Europe/Mediterranean      | Sapindaceae                    | <i>Acer</i> spp.                                                                                              |
| <i>Euphyllura canariensis</i> | 1              | Oleaceae          | <i>Picconia excelsa</i>                                                                    | unresolved                      | –                         | –                              | –                                                                                                             |
| <i>Euphyllura confusa</i>     | 1              | Oleaceae          | <i>Olea europaea</i>                                                                       | <i>Euphyllura olivina</i>       | Mediterranean             | Oleaceae                       | <i>Olea europaea</i>                                                                                          |
| <i>Megadicrania tecticeps</i> | 1              | Oleaceae          | <i>Olea</i> spp.                                                                           | unresolved                      | –                         | –                              | –                                                                                                             |
| <i>Strophingia</i> lineage    | 4              | Ericaceae         | <i>Erica</i> spp.                                                                          | <i>Strophingia ericae</i>       | Europe/Mediterranean      | Ericaceae                      | <i>Erica cinerea</i>                                                                                          |
| <i>Arytaina</i> lineage I     | 3              | Fabaceae          | <i>Chamaecytisus proliferus</i> ssp.                                                       | <i>Arytaina</i> spp.            | Europe/Mediterranean      | Fabaceae                       | <i>Adenocarpus</i> spp., <i>Chamaecytisus</i> spp.                                                            |
| <i>Arytaina</i> lineage II    | 2              | Fabaceae          | <i>Spartocytisus</i> spp.                                                                  | <i>Arytaina</i> spp.            | Europe/Mediterranean      | Fabaceae                       | <i>Adenocarpus</i> spp., <i>Chamaecytisus</i> spp.                                                            |
| <i>Arytainilla serpentina</i> | 1              | Fabaceae          | <i>Spartocytisus filipes</i>                                                               | <i>Arytainilla spartiophila</i> | Europe/Mediterranean      | Fabaceae                       | <i>Cytisus scoparius</i>                                                                                      |
| <i>Arytinnis</i> lineage      | 18             | Fabaceae          | <i>Teline</i> spp., <i>Adenocarpus</i> spp., <i>Chamaecytisus</i> spp., <i>Genista</i> sp. | <i>Livilla</i> ssp.             | Europe/Mediterranean      | Fabaceae                       | <i>Retama</i> , <i>Genista</i> , <i>Laburnum</i> , <i>Chamaecytisus</i> , <i>Cytisus</i> , <i>Lembotropis</i> |
| <i>Cacopsylla atlantica</i>   | 1              | Salicaceae        | <i>Salix canariensis</i>                                                                   | <i>Cacopsylla saliceti</i>      | Europe/Mediterranean      | Salicaceae                     | <i>Salix</i> spp.                                                                                             |
| <i>Cacopsylla crenulatae</i>  | 1              | Rhamnaceae        | <i>Rhamnus crenulata</i>                                                                   | <i>Cacopsylla myrthi</i>        | Mediterranean             | Rhamnaceae                     | <i>Rhamnus alaternus</i>                                                                                      |

|                                |   |                |                                                          |                                                      |                      |              |                                                                                                                           |
|--------------------------------|---|----------------|----------------------------------------------------------|------------------------------------------------------|----------------------|--------------|---------------------------------------------------------------------------------------------------------------------------|
| <i>Cacopsylla</i> lineage I    | 2 | Rhamnaceae     | <i>Rhamnus glandulosa</i>                                | <i>Cacopsylla rhamnicola</i>                         | Europe/Mediterranean | Rhamnaceae   | <i>Rhamnus</i> spp.                                                                                                       |
| <i>Diaphorina gonzalezi</i>    | 1 | Celastraceae   | <i>Gymnosporia cassinoides</i>                           | <i>Diaphorina gymnosporiae</i>                       | South Asia           | Celastraceae | <i>Gymnosporia royleana</i> , <i>G. spinosa</i>                                                                           |
| <i>Livilla monospermae</i>     | 1 | Fabaceae       | <i>Retama rhodorhizoides</i>                             | <i>Livilla</i> spp. including <i>Livilla retamae</i> | Europe/Mediterranean | Fabaceae     | <i>Retama</i> , <i>Genista</i> , <i>Laburnum</i> , <i>Chamaecytisus</i> , <i>Cytisus</i> , <i>Lembotropis</i>             |
| <i>Drepanoza</i> lineage I     | 3 | Convolvulaceae | <i>Convolvulus</i> lineage I<br><i>Whitania aristata</i> | unresolved                                           | –                    | –            | –                                                                                                                         |
| <i>Drepanoza</i> lineage II    | 2 | Convolvulaceae | <i>Pittosporum coriaceum</i>                             | unresolved                                           | –                    | –            | –                                                                                                                         |
| <i>Lauritrioza laurisilvae</i> | 1 | Lauraceae      | <i>Laurus novocanariensis</i>                            | <i>Lauritrioza alacris</i>                           | Mediterranean        | Lauraceae    | <i>Laurus nobilis</i>                                                                                                     |
| <i>Percyella</i> lineage       | 4 | Convolvulaceae | <i>Convolvulus</i> lineage II<br>( <i>C. floridus</i> )  | <i>Spanioza galii</i>                                | Europe/Mediterranean | Rubiaceae    | <i>Ambrosia</i> , <i>Asperula</i> , <i>Cruciata</i> , <i>Galium</i> , <i>Rubia</i> , <i>Scherardia</i> , <i>Sherardia</i> |
